# Supplementary material
Source: MDPI journal article supplement (https://www.mdpi.com/2571-6255/4/2/19)
Supplement: s1 [file s1]

Archive with 24 entries (22 files):
- fire-1164930-supp/
- fire-1164930-supp/.DS_Store
- fire-1164930-supp/Definitions/
- fire-1164930-supp/Definitions/chicago2.bst
- fire-1164930-supp/Definitions/journalnames.tex
- fire-1164930-supp/Definitions/logo-ccby.eps
- fire-1164930-supp/Definitions/logo-mdpi.eps
- fire-1164930-supp/Definitions/logo-orcid-eps-converted-to.pdf
- fire-1164930-supp/Definitions/logo-orcid.eps
- fire-1164930-supp/Definitions/logo-updates.pdf
- fire-1164930-supp/Definitions/mdpi.bst
- fire-1164930-supp/Definitions/mdpi.cls
- fire-1164930-supp/RX_PAPER_FIGS1-eps-converted-to.pdf
- fire-1164930-supp/RX_PAPER_FIGS1.eps
- fire-1164930-supp/RX_PAPER_FIGS2_DNR-eps-converted-to.pdf
- fire-1164930-supp/RX_PAPER_FIGS2_DNR.eps
- fire-1164930-supp/RX_PAPER_FIGS3_DNR-eps-converted-to.pdf
- fire-1164930-supp/RX_PAPER_FIGS3_DNR.eps
- fire-1164930-supp/supp.aux
- fire-1164930-supp/supp.log
- fire-1164930-supp/supp.out
- fire-1164930-supp/supp.pdf
- fire-1164930-supp/supp.synctex.gz
- fire-1164930-supp/supp.tex
