# Supplementary material
Source: MDPI journal article supplement (https://www.mdpi.com/2571-6255/4/2/19)
Supplement: s1 [file s1 › fire-1164930-supp/supp.aux]

\relax 
\providecommand\hyper@newdestlabel[2]{}
\bibstyle{Definitions/mdpi}
\providecommand\HyperFirstAtBeginDocument{\AtBeginDocument}
\HyperFirstAtBeginDocument{\ifx\hyper@anchor\@undefined
\global\let\oldcontentsline\contentsline
\gdef\contentsline#1#2#3#4{\oldcontentsline{#1}{#2}{#3}}
\global\let\oldnewlabel\newlabel
\gdef\newlabel#1#2{\newlabelxx{#1}#2}
\gdef\newlabelxx#1#2#3#4#5#6{\oldnewlabel{#1}{{#2}{#3}}}
\AtEndDocument{\ifx\hyper@anchor\@undefined
\let\contentsline\oldcontentsline
\let\newlabel\oldnewlabel
\fi}
\fi}
\global\let\hyper@last\relax 
\gdef\HyperFirstAtBeginDocument#1{#1}
\providecommand\HyField@AuxAddToFields[1]{}
\providecommand\HyField@AuxAddToCoFields[2]{}
\@writefile{toc}{\contentsline {section}{\numberline {1}Data filtering}{1}{section.1}\protected@file@percent }
\@writefile{lof}{\contentsline {figure}{\numberline {S1}{\ignorespaces Scatterplot of actual versus proposed area (a) and volume (b) with a 1-1 line overlaid.\relax }}{1}{figure.caption.1}\protected@file@percent }
\@writefile{toc}{\contentsline {section}{\numberline {2}Accomplished versus proposed burn levels}{2}{section.2}\protected@file@percent }
\@writefile{lof}{\contentsline {figure}{\numberline {S2}{\ignorespaces The empirical cumulative distribution function of the ratio between accomplished and proposed burn area and burned volume for each region. The probability that an approved fire burns nothing is denoted on the left of each panel, and the probability that an approved fire burns all of what was proposed is denoted on the right of each panel. The expected ratio is identified with a plus sign on the x-axis. Note Northeast (NE), Northwest (NW), Olympic (OLY), Pacific Coast (PC), South Puget Sound (SPS), and Southeast (SE).\relax }}{3}{figure.caption.2}\protected@file@percent }
\providecommand*\caption@xref[2]{\@setref\relax\@undefined{#1}}
\newlabel{fig:completion}{{S2}{3}{The empirical cumulative distribution function of the ratio between accomplished and proposed burn area and burned volume for each region. The probability that an approved fire burns nothing is denoted on the left of each panel, and the probability that an approved fire burns all of what was proposed is denoted on the right of each panel. The expected ratio is identified with a plus sign on the x-axis. Note Northeast (NE), Northwest (NW), Olympic (OLY), Pacific Coast (PC), South Puget Sound (SPS), and Southeast (SE).\relax }{figure.caption.2}{}}
\@writefile{lof}{\contentsline {figure}{\numberline {S3}{\ignorespaces The expected ratio between accomplished and proposed area at annual (a) and monthly (b) timesteps and the expected ratio between accomplished and proposed volume disaggregated by year (c) and month (d).\relax }}{4}{figure.caption.3}\protected@file@percent }
\newlabel{fig:completion_season}{{S3}{4}{The expected ratio between accomplished and proposed area at annual (a) and monthly (b) timesteps and the expected ratio between accomplished and proposed volume disaggregated by year (c) and month (d).\relax }{figure.caption.3}{}}
\@writefile{toc}{\contentsline {section}{\numberline {3}Interannual boxcox analysis}{4}{section.3}\protected@file@percent }
\@writefile{lot}{\contentsline {table}{\numberline {S1}{\ignorespaces Best data transformation in five prescribed fire parameters from 2004-2019 for each DNR administrative region (Northeast (NE), Northwest (NW), Olympic (OLY), Pacific Coast (PC), South Puget Sound (SPS), and Southeast (SE)). The percent change in the unadjusted $R^2$ when substituting the nonlinear model for the linear one are reported in the parenthesis. Note that the data-transformations rarely improved the ability of the models to predict historical prescribed fire data.\relax }}{4}{table.caption.4}\protected@file@percent }
\newlabel{table:trend}{{S1}{4}{Best data transformation in five prescribed fire parameters from 2004-2019 for each DNR administrative region (Northeast (NE), Northwest (NW), Olympic (OLY), Pacific Coast (PC), South Puget Sound (SPS), and Southeast (SE)). The percent change in the unadjusted $R^2$ when substituting the nonlinear model for the linear one are reported in the parenthesis. Note that the data-transformations rarely improved the ability of the models to predict historical prescribed fire data.\relax }{table.caption.4}{}}
\newlabel{LastPage}{{}{4}{}{page.4}{}}
\xdef\lastpage@lastpage{4}
\xdef\lastpage@lastpageHy{4}
\expandafter\ifx\csname c@page@totc\endcsname\relax\newcounter{page@totc}\fi\setcounter{page@totc}{5}
