# Supplementary material
Source: MDPI journal article supplement (https://www.mdpi.com/2571-6255/4/2/19)
Supplement: s1 [file s1 › fire-1164930-supp/supp.log]

This is pdfTeX, Version 3.14159265-2.6-1.40.21 (MiKTeX 2.9.7400 64-bit) (preloaded format=pdflatex 2020.9.17)  27 APR 2021 09:58
entering extended mode
**./supp.tex
(supp.tex
LaTeX2e <2020-02-02> patch level 5
L3 programming layer <2020-03-06> (Definitions/mdpi.cls
Document Class: Definitions/mdpi 24/05/2019 MDPI paper class
("C:\Program Files\MiKTeX 2.9\tex/latex/base\article.cls"
Document Class: article 2019/12/20 v1.4l Standard LaTeX document class
("C:\Program Files\MiKTeX 2.9\tex/latex/base\size10.clo"
File: size10.clo 2019/12/20 v1.4l Standard LaTeX file (size option)
)
\c@part=\count167
\c@section=\count168
\c@subsection=\count169
\c@subsubsection=\count170
\c@paragraph=\count171
\c@subparagraph=\count172
\c@figure=\count173
\c@table=\count174
\abovecaptionskip=\skip47
\belowcaptionskip=\skip48
\bibindent=\dimen134
)
("C:\Program Files\MiKTeX 2.9\tex/latex/base\fontenc.sty"
Package: fontenc 2020/02/11 v2.0o Standard LaTeX package
)
("C:\Program Files\MiKTeX 2.9\tex/latex/base\inputenc.sty"
Package: inputenc 2018/08/11 v1.3c Input encoding file
\inpenc@prehook=\toks15
\inpenc@posthook=\toks16
)
("C:\Program Files\MiKTeX 2.9\tex/latex/tools\calc.sty"
Package: calc 2017/05/25 v4.3 Infix arithmetic (KKT,FJ)
\calc@Acount=\count175
\calc@Bcount=\count176
\calc@Adimen=\dimen135
\calc@Bdimen=\dimen136
\calc@Askip=\skip49
\calc@Bskip=\skip50
LaTeX Info: Redefining \setlength on input line 80.
LaTeX Info: Redefining \addtolength on input line 81.
\calc@Ccount=\count177
\calc@Cskip=\skip51
)
("C:\Program Files\MiKTeX 2.9\tex/latex/tools\indentfirst.sty"
Package: indentfirst 1995/11/23 v1.03 Indent first paragraph (DPC)
)
("C:\Program Files\MiKTeX 2.9\tex/latex/fancyhdr\fancyhdr.sty"
Package: fancyhdr 2019/01/31 v3.10 Extensive control of page headers and footer
s
\f@nch@headwidth=\skip52
\f@nch@O@elh=\skip53
\f@nch@O@erh=\skip54
\f@nch@O@olh=\skip55
\f@nch@O@orh=\skip56
\f@nch@O@elf=\skip57
\f@nch@O@erf=\skip58
\f@nch@O@olf=\skip59
\f@nch@O@orf=\skip60
)
("C:\Program Files\MiKTeX 2.9\tex/latex/graphics\graphicx.sty"
Package: graphicx 2019/11/30 v1.2a Enhanced LaTeX Graphics (DPC,SPQR)

("C:\Program Files\MiKTeX 2.9\tex/latex/graphics\keyval.sty"
Package: keyval 2014/10/28 v1.15 key=value parser (DPC)
\KV@toks@=\toks17
)
("C:\Program Files\MiKTeX 2.9\tex/latex/graphics\graphics.sty"
Package: graphics 2019/11/30 v1.4a Standard LaTeX Graphics (DPC,SPQR)

("C:\Program Files\MiKTeX 2.9\tex/latex/graphics\trig.sty"
Package: trig 2016/01/03 v1.10 sin cos tan (DPC)
)
("C:\Program Files\MiKTeX 2.9\tex/latex/graphics-cfg\graphics.cfg"
File: graphics.cfg 2016/06/04 v1.11 sample graphics configuration
)
Package graphics Info: Driver file: pdftex.def on input line 105.

("C:\Program Files\MiKTeX 2.9\tex/latex/graphics-def\pdftex.def"
File: pdftex.def 2018/01/08 v1.0l Graphics/color driver for pdftex
))
\Gin@req@height=\dimen137
\Gin@req@width=\dimen138
)
("C:\Program Files\MiKTeX 2.9\tex/latex/epstopdf-pkg\epstopdf.sty"
Package: epstopdf 2020-01-24 v2.11 Conversion with epstopdf on the fly (HO)

("C:\Program Files\MiKTeX 2.9\tex/generic/infwarerr\infwarerr.sty"
Package: infwarerr 2019/12/03 v1.5 Providing info/warning/error messages (HO)
)
("C:\Program Files\MiKTeX 2.9\tex/latex/grfext\grfext.sty"
Package: grfext 2019/12/03 v1.3 Manage graphics extensions (HO)

("C:\Program Files\MiKTeX 2.9\tex/generic/kvdefinekeys\kvdefinekeys.sty"
Package: kvdefinekeys 2019-12-19 v1.6 Define keys (HO)
))
("C:\Program Files\MiKTeX 2.9\tex/latex/kvoptions\kvoptions.sty"
Package: kvoptions 2019/11/29 v3.13 Key value format for package options (HO)

("C:\Program Files\MiKTeX 2.9\tex/generic/ltxcmds\ltxcmds.sty"
Package: ltxcmds 2019/12/15 v1.24 LaTeX kernel commands for general use (HO)
)
("C:\Program Files\MiKTeX 2.9\tex/generic/kvsetkeys\kvsetkeys.sty"
Package: kvsetkeys 2019/12/15 v1.18 Key value parser (HO)
))
("C:\Program Files\MiKTeX 2.9\tex/latex/pdftexcmds\pdftexcmds.sty"
Package: pdftexcmds 2019/11/24 v0.31 Utility functions of pdfTeX for LuaTeX (HO
)

("C:\Program Files\MiKTeX 2.9\tex/generic/iftex\iftex.sty"
Package: iftex 2020/03/06 v1.0d TeX engine tests
)
Package pdftexcmds Info: \pdf@primitive is available.
Package pdftexcmds Info: \pdf@ifprimitive is available.
Package pdftexcmds Info: \pdfdraftmode found.
)
("C:\Program Files\MiKTeX 2.9\tex/latex/epstopdf-pkg\epstopdf-base.sty"
Package: epstopdf-base 2020-01-24 v2.11 Base part for package epstopdf
Package epstopdf-base Info: Redefining graphics rule for `.eps' on input line 4
85.
Package grfext Info: Graphics extension search list:
(grfext)             [.pdf,.png,.jpg,.mps,.jpeg,.jbig2,.jb2,.PDF,.PNG,.JPG,.JPE
G,.JBIG2,.JB2,.eps]
(grfext)             \AppendGraphicsExtensions on input line 504.
))
("C:\Program Files\MiKTeX 2.9\tex/latex/lastpage\lastpage.sty"
Package: lastpage 2015/03/29 v1.2m Refers to last page's name (HMM; JPG)
)
("C:\Program Files\MiKTeX 2.9\tex/latex/base\ifthen.sty"
Package: ifthen 2014/09/29 v1.1c Standard LaTeX ifthen package (DPC)
)
("C:\Program Files\MiKTeX 2.9\tex/latex/lineno\lineno.sty"
Package: lineno 2005/11/02 line numbers on paragraphs v4.41
\linenopenalty=\count178
\output=\toks18
\linenoprevgraf=\count179
\linenumbersep=\dimen139
\linenumberwidth=\dimen140
\c@linenumber=\count180
\c@pagewiselinenumber=\count181
\c@LN@truepage=\count182
\c@internallinenumber=\count183
\c@internallinenumbers=\count184
\quotelinenumbersep=\dimen141
\bframerule=\dimen142
\bframesep=\dimen143
\bframebox=\box45
LaTeX Info: Redefining \\ on input line 3056.
)
("C:\Program Files\MiKTeX 2.9\tex/latex/float\float.sty"
Package: float 2001/11/08 v1.3d Float enhancements (AL)
\c@float@type=\count185
\float@exts=\toks19
\float@box=\box46
\@float@everytoks=\toks20
\@floatcapt=\box47
)
("C:\Program Files\MiKTeX 2.9\tex/latex/amsmath\amsmath.sty"
Package: amsmath 2020/01/20 v2.17e AMS math features
\@mathmargin=\skip61

For additional information on amsmath, use the `?' option.
("C:\Program Files\MiKTeX 2.9\tex/latex/amsmath\amstext.sty"
Package: amstext 2000/06/29 v2.01 AMS text

("C:\Program Files\MiKTeX 2.9\tex/latex/amsmath\amsgen.sty"
File: amsgen.sty 1999/11/30 v2.0 generic functions
\@emptytoks=\toks21
\ex@=\dimen144
))
("C:\Program Files\MiKTeX 2.9\tex/latex/amsmath\amsbsy.sty"
Package: amsbsy 1999/11/29 v1.2d Bold Symbols
\pmbraise@=\dimen145
)
("C:\Program Files\MiKTeX 2.9\tex/latex/amsmath\amsopn.sty"
Package: amsopn 2016/03/08 v2.02 operator names
)
\inf@bad=\count186
LaTeX Info: Redefining \frac on input line 227.
\uproot@=\count187
\leftroot@=\count188
LaTeX Info: Redefining \overline on input line 389.
\classnum@=\count189
\DOTSCASE@=\count190
LaTeX Info: Redefining \ldots on input line 486.
LaTeX Info: Redefining \dots on input line 489.
LaTeX Info: Redefining \cdots on input line 610.
\Mathstrutbox@=\box48
\strutbox@=\box49
\big@size=\dimen146
LaTeX Font Info:    Redeclaring font encoding OML on input line 733.
LaTeX Font Info:    Redeclaring font encoding OMS on input line 734.
\macc@depth=\count191
\c@MaxMatrixCols=\count192
\dotsspace@=\muskip16
\c@parentequation=\count193
\dspbrk@lvl=\count194
\tag@help=\toks22
\row@=\count195
\column@=\count196
\maxfields@=\count197
\andhelp@=\toks23
\eqnshift@=\dimen147
\alignsep@=\dimen148
\tagshift@=\dimen149
\tagwidth@=\dimen150
\totwidth@=\dimen151
\lineht@=\dimen152
\@envbody=\toks24
\multlinegap=\skip62
\multlinetaggap=\skip63
\mathdisplay@stack=\toks25
LaTeX Info: Redefining \[ on input line 2859.
LaTeX Info: Redefining \] on input line 2860.
)
("C:\Program Files\MiKTeX 2.9\tex/latex/setspace\setspace.sty"
Package: setspace 2011/12/19 v6.7a set line spacing
)
("C:\Program Files\MiKTeX 2.9\tex/latex/enumitem\enumitem.sty"
Package: enumitem 2019/06/20 v3.9 Customized lists
\labelindent=\skip64
\enit@outerparindent=\dimen153
\enit@toks=\toks26
\enit@inbox=\box50
\enit@count@id=\count198
\enitdp@description=\count199
)
("C:\Program Files\MiKTeX 2.9\tex/latex/psnfss\mathpazo.sty"
Package: mathpazo 2005/04/12 PSNFSS-v9.2a Palatino w/ Pazo Math (D.Puga, WaS) 
\symupright=\mathgroup4
)
("C:\Program Files\MiKTeX 2.9\tex/latex/booktabs\booktabs.sty"
Package: booktabs 2020/01/12 v1.61803398 Publication quality tables
\heavyrulewidth=\dimen154
\lightrulewidth=\dimen155
\cmidrulewidth=\dimen156
\belowrulesep=\dimen157
\belowbottomsep=\dimen158
\aboverulesep=\dimen159
\abovetopsep=\dimen160
\cmidrulesep=\dimen161
\cmidrulekern=\dimen162
\defaultaddspace=\dimen163
\@cmidla=\count266
\@cmidlb=\count267
\@aboverulesep=\dimen164
\@belowrulesep=\dimen165
\@thisruleclass=\count268
\@lastruleclass=\count269
\@thisrulewidth=\dimen166
)
("C:\Program Files\MiKTeX 2.9\tex/latex/titlesec\titlesec.sty"
Package: titlesec 2019/10/16 v2.13 Sectioning titles
\ttl@box=\box51
\beforetitleunit=\skip65
\aftertitleunit=\skip66
\ttl@plus=\dimen167
\ttl@minus=\dimen168
\ttl@toksa=\toks27
\titlewidth=\dimen169
\titlewidthlast=\dimen170
\titlewidthfirst=\dimen171
)
("C:\Program Files\MiKTeX 2.9\tex/latex/etoolbox\etoolbox.sty"
Package: etoolbox 2019/09/21 v2.5h e-TeX tools for LaTeX (JAW)
\etb@tempcnta=\count270
)
("C:\Program Files\MiKTeX 2.9\tex/latex/tabto-ltx\tabto.sty"
Package: tabto 2018/12/28  v 1.4  Another tabbing mechanism
\CurrentLineWidth=\dimen172
\TabPrevPos=\dimen173
)
("C:\Program Files\MiKTeX 2.9\tex/latex/xcolor\xcolor.sty"
Package: xcolor 2016/05/11 v2.12 LaTeX color extensions (UK)

("C:\Program Files\MiKTeX 2.9\tex/latex/graphics-cfg\color.cfg"
File: color.cfg 2016/01/02 v1.6 sample color configuration
)
Package xcolor Info: Driver file: pdftex.def on input line 225.

("C:\Program Files\MiKTeX 2.9\tex/latex/colortbl\colortbl.sty"
Package: colortbl 2020/01/04 v1.0e Color table columns (DPC)

("C:\Program Files\MiKTeX 2.9\tex/latex/tools\array.sty"
Package: array 2019/08/31 v2.4l Tabular extension package (FMi)
\col@sep=\dimen174
\ar@mcellbox=\box52
\extrarowheight=\dimen175
\NC@list=\toks28
\extratabsurround=\skip67
\backup@length=\skip68
\ar@cellbox=\box53
)
\everycr=\toks29
\minrowclearance=\skip69
)
\rownum=\count271
Package xcolor Info: Model `cmy' substituted by `cmy0' on input line 1348.
Package xcolor Info: Model `hsb' substituted by `rgb' on input line 1352.
Package xcolor Info: Model `RGB' extended on input line 1364.
Package xcolor Info: Model `HTML' substituted by `rgb' on input line 1366.
Package xcolor Info: Model `Hsb' substituted by `hsb' on input line 1367.
Package xcolor Info: Model `tHsb' substituted by `hsb' on input line 1368.
Package xcolor Info: Model `HSB' substituted by `hsb' on input line 1369.
Package xcolor Info: Model `Gray' substituted by `gray' on input line 1370.
Package xcolor Info: Model `wave' substituted by `hsb' on input line 1371.
)
("C:\Program Files\MiKTeX 2.9\tex/latex/soul\soul.sty"
Package: soul 2003/11/17 v2.4 letterspacing/underlining (mf)
\SOUL@word=\toks30
\SOUL@lasttoken=\toks31
\SOUL@cmds=\toks32
\SOUL@buffer=\toks33
\SOUL@token=\toks34
\SOUL@spaceskip=\skip70
\SOUL@ttwidth=\dimen176
\SOUL@uldp=\dimen177
\SOUL@ulht=\dimen178
)
("C:\Program Files\MiKTeX 2.9\tex/latex/multirow\multirow.sty"
Package: multirow 2019/05/31 v2.5 Span multiple rows of a table
\multirow@colwidth=\skip71
\multirow@cntb=\count272
\multirow@dima=\skip72
\bigstrutjot=\dimen179
)
("C:\Program Files\MiKTeX 2.9\tex/latex/microtype\microtype.sty"
Package: microtype 2019/11/18 v2.7d Micro-typographical refinements (RS)
\MT@toks=\toks35
\MT@count=\count273
LaTeX Info: Redefining \textls on input line 790.
\MT@outer@kern=\dimen180
LaTeX Info: Redefining \textmicrotypecontext on input line 1354.
\MT@listname@count=\count274

("C:\Program Files\MiKTeX 2.9\tex/latex/microtype\microtype-pdftex.def"
File: microtype-pdftex.def 2019/11/18 v2.7d Definitions specific to pdftex (RS)

LaTeX Info: Redefining \lsstyle on input line 914.
LaTeX Info: Redefining \lslig on input line 914.
\MT@outer@space=\skip73
)
Package microtype Info: Loading configuration file microtype.cfg.

("C:\Program Files\MiKTeX 2.9\tex/latex/microtype\microtype.cfg"
File: microtype.cfg 2019/11/18 v2.7d microtype main configuration file (RS)
))
("C:\Program Files\MiKTeX 2.9\tex/latex/pgf/frontendlayer\tikz.sty"
("C:\Program Files\MiKTeX 2.9\tex/latex/pgf/basiclayer\pgf.sty"
("C:\Program Files\MiKTeX 2.9\tex/latex/pgf/utilities\pgfrcs.sty"
("C:\Program Files\MiKTeX 2.9\tex/generic/pgf/utilities\pgfutil-common.tex"
\pgfutil@everybye=\toks36
\pgfutil@tempdima=\dimen181
\pgfutil@tempdimb=\dimen182

("C:\Program Files\MiKTeX 2.9\tex/generic/pgf/utilities\pgfutil-common-lists.te
x")) ("C:\Program Files\MiKTeX 2.9\tex/generic/pgf/utilities\pgfutil-latex.def"
\pgfutil@abb=\box54
("C:\Program Files\MiKTeX 2.9\tex/latex/ms\everyshi.sty"
Package: everyshi 2001/05/15 v3.00 EveryShipout Package (MS)
))
("C:\Program Files\MiKTeX 2.9\tex/generic/pgf/utilities\pgfrcs.code.tex"
("C:\Program Files\MiKTeX 2.9\tex/generic/pgf\pgf.revision.tex")
Package: pgfrcs 2020/01/08 v3.1.5b (3.1.5b)
))
Package: pgf 2020/01/08 v3.1.5b (3.1.5b)

("C:\Program Files\MiKTeX 2.9\tex/latex/pgf/basiclayer\pgfcore.sty"
("C:\Program Files\MiKTeX 2.9\tex/latex/pgf/systemlayer\pgfsys.sty"
("C:\Program Files\MiKTeX 2.9\tex/generic/pgf/systemlayer\pgfsys.code.tex"
Package: pgfsys 2020/01/08 v3.1.5b (3.1.5b)

("C:\Program Files\MiKTeX 2.9\tex/generic/pgf/utilities\pgfkeys.code.tex"
\pgfkeys@pathtoks=\toks37
\pgfkeys@temptoks=\toks38

("C:\Program Files\MiKTeX 2.9\tex/generic/pgf/utilities\pgfkeysfiltered.code.te
x"
\pgfkeys@tmptoks=\toks39
))
\pgf@x=\dimen183
\pgf@y=\dimen184
\pgf@xa=\dimen185
\pgf@ya=\dimen186
\pgf@xb=\dimen187
\pgf@yb=\dimen188
\pgf@xc=\dimen189
\pgf@yc=\dimen190
\pgf@xd=\dimen191
\pgf@yd=\dimen192
\w@pgf@writea=\write3
\r@pgf@reada=\read2
\c@pgf@counta=\count275
\c@pgf@countb=\count276
\c@pgf@countc=\count277
\c@pgf@countd=\count278
\t@pgf@toka=\toks40
\t@pgf@tokb=\toks41
\t@pgf@tokc=\toks42
\pgf@sys@id@count=\count279
 ("C:\Program Files\MiKTeX 2.9\tex/generic/pgf/systemlayer\pgf.cfg"
File: pgf.cfg 2020/01/08 v3.1.5b (3.1.5b)
)
Driver file for pgf: pgfsys-pdftex.def

("C:\Program Files\MiKTeX 2.9\tex/generic/pgf/systemlayer\pgfsys-pdftex.def"
File: pgfsys-pdftex.def 2020/01/08 v3.1.5b (3.1.5b)

("C:\Program Files\MiKTeX 2.9\tex/generic/pgf/systemlayer\pgfsys-common-pdf.def
"
File: pgfsys-common-pdf.def 2020/01/08 v3.1.5b (3.1.5b)
)))
("C:\Program Files\MiKTeX 2.9\tex/generic/pgf/systemlayer\pgfsyssoftpath.code.t
ex"
File: pgfsyssoftpath.code.tex 2020/01/08 v3.1.5b (3.1.5b)
\pgfsyssoftpath@smallbuffer@items=\count280
\pgfsyssoftpath@bigbuffer@items=\count281
)
("C:\Program Files\MiKTeX 2.9\tex/generic/pgf/systemlayer\pgfsysprotocol.code.t
ex"
File: pgfsysprotocol.code.tex 2020/01/08 v3.1.5b (3.1.5b)
)) ("C:\Program Files\MiKTeX 2.9\tex/generic/pgf/basiclayer\pgfcore.code.tex"
Package: pgfcore 2020/01/08 v3.1.5b (3.1.5b)
 ("C:\Program Files\MiKTeX 2.9\tex/generic/pgf/math\pgfmath.code.tex"
("C:\Program Files\MiKTeX 2.9\tex/generic/pgf/math\pgfmathcalc.code.tex"
("C:\Program Files\MiKTeX 2.9\tex/generic/pgf/math\pgfmathutil.code.tex")
("C:\Program Files\MiKTeX 2.9\tex/generic/pgf/math\pgfmathparser.code.tex"
\pgfmath@dimen=\dimen193
\pgfmath@count=\count282
\pgfmath@box=\box55
\pgfmath@toks=\toks43
\pgfmath@stack@operand=\toks44
\pgfmath@stack@operation=\toks45
)
("C:\Program Files\MiKTeX 2.9\tex/generic/pgf/math\pgfmathfunctions.code.tex"
("C:\Program Files\MiKTeX 2.9\tex/generic/pgf/math\pgfmathfunctions.basic.code.
tex")
("C:\Program Files\MiKTeX 2.9\tex/generic/pgf/math\pgfmathfunctions.trigonometr
ic.code.tex")
("C:\Program Files\MiKTeX 2.9\tex/generic/pgf/math\pgfmathfunctions.random.code
.tex")
("C:\Program Files\MiKTeX 2.9\tex/generic/pgf/math\pgfmathfunctions.comparison.
code.tex")
("C:\Program Files\MiKTeX 2.9\tex/generic/pgf/math\pgfmathfunctions.base.code.t
ex")
("C:\Program Files\MiKTeX 2.9\tex/generic/pgf/math\pgfmathfunctions.round.code.
tex")
("C:\Program Files\MiKTeX 2.9\tex/generic/pgf/math\pgfmathfunctions.misc.code.t
ex")
("C:\Program Files\MiKTeX 2.9\tex/generic/pgf/math\pgfmathfunctions.integerarit
hmetics.code.tex")))
("C:\Program Files\MiKTeX 2.9\tex/generic/pgf/math\pgfmathfloat.code.tex"
\c@pgfmathroundto@lastzeros=\count283
))
("C:\Program Files\MiKTeX 2.9\tex/generic/pgf/math\pgfint.code.tex")
("C:\Program Files\MiKTeX 2.9\tex/generic/pgf/basiclayer\pgfcorepoints.code.tex
"
File: pgfcorepoints.code.tex 2020/01/08 v3.1.5b (3.1.5b)
\pgf@picminx=\dimen194
\pgf@picmaxx=\dimen195
\pgf@picminy=\dimen196
\pgf@picmaxy=\dimen197
\pgf@pathminx=\dimen198
\pgf@pathmaxx=\dimen199
\pgf@pathminy=\dimen256
\pgf@pathmaxy=\dimen257
\pgf@xx=\dimen258
\pgf@xy=\dimen259
\pgf@yx=\dimen260
\pgf@yy=\dimen261
\pgf@zx=\dimen262
\pgf@zy=\dimen263
)
("C:\Program Files\MiKTeX 2.9\tex/generic/pgf/basiclayer\pgfcorepathconstruct.c
ode.tex"
File: pgfcorepathconstruct.code.tex 2020/01/08 v3.1.5b (3.1.5b)
\pgf@path@lastx=\dimen264
\pgf@path@lasty=\dimen265
)
("C:\Program Files\MiKTeX 2.9\tex/generic/pgf/basiclayer\pgfcorepathusage.code.
tex"
File: pgfcorepathusage.code.tex 2020/01/08 v3.1.5b (3.1.5b)
\pgf@shorten@end@additional=\dimen266
\pgf@shorten@start@additional=\dimen267
)
("C:\Program Files\MiKTeX 2.9\tex/generic/pgf/basiclayer\pgfcorescopes.code.tex
"
File: pgfcorescopes.code.tex 2020/01/08 v3.1.5b (3.1.5b)
\pgfpic=\box56
\pgf@hbox=\box57
\pgf@layerbox@main=\box58
\pgf@picture@serial@count=\count284
)
("C:\Program Files\MiKTeX 2.9\tex/generic/pgf/basiclayer\pgfcoregraphicstate.co
de.tex"
File: pgfcoregraphicstate.code.tex 2020/01/08 v3.1.5b (3.1.5b)
\pgflinewidth=\dimen268
)
("C:\Program Files\MiKTeX 2.9\tex/generic/pgf/basiclayer\pgfcoretransformations
.code.tex"
File: pgfcoretransformations.code.tex 2020/01/08 v3.1.5b (3.1.5b)
\pgf@pt@x=\dimen269
\pgf@pt@y=\dimen270
\pgf@pt@temp=\dimen271
)
("C:\Program Files\MiKTeX 2.9\tex/generic/pgf/basiclayer\pgfcorequick.code.tex"
File: pgfcorequick.code.tex 2020/01/08 v3.1.5b (3.1.5b)
)
("C:\Program Files\MiKTeX 2.9\tex/generic/pgf/basiclayer\pgfcoreobjects.code.te
x"
File: pgfcoreobjects.code.tex 2020/01/08 v3.1.5b (3.1.5b)
)
("C:\Program Files\MiKTeX 2.9\tex/generic/pgf/basiclayer\pgfcorepathprocessing.
code.tex"
File: pgfcorepathprocessing.code.tex 2020/01/08 v3.1.5b (3.1.5b)
)
("C:\Program Files\MiKTeX 2.9\tex/generic/pgf/basiclayer\pgfcorearrows.code.tex
"
File: pgfcorearrows.code.tex 2020/01/08 v3.1.5b (3.1.5b)
\pgfarrowsep=\dimen272
)
("C:\Program Files\MiKTeX 2.9\tex/generic/pgf/basiclayer\pgfcoreshade.code.tex"
File: pgfcoreshade.code.tex 2020/01/08 v3.1.5b (3.1.5b)
\pgf@max=\dimen273
\pgf@sys@shading@range@num=\count285
\pgf@shadingcount=\count286
) ("C:\Program Files\MiKTeX 2.9\tex/generic/pgf/basiclayer\pgfcoreimage.code.te
x"
File: pgfcoreimage.code.tex 2020/01/08 v3.1.5b (3.1.5b)

("C:\Program Files\MiKTeX 2.9\tex/generic/pgf/basiclayer\pgfcoreexternal.code.t
ex"
File: pgfcoreexternal.code.tex 2020/01/08 v3.1.5b (3.1.5b)
\pgfexternal@startupbox=\box59
))
("C:\Program Files\MiKTeX 2.9\tex/generic/pgf/basiclayer\pgfcorelayers.code.tex
"
File: pgfcorelayers.code.tex 2020/01/08 v3.1.5b (3.1.5b)
)
("C:\Program Files\MiKTeX 2.9\tex/generic/pgf/basiclayer\pgfcoretransparency.co
de.tex"
File: pgfcoretransparency.code.tex 2020/01/08 v3.1.5b (3.1.5b)
)
("C:\Program Files\MiKTeX 2.9\tex/generic/pgf/basiclayer\pgfcorepatterns.code.t
ex"
File: pgfcorepatterns.code.tex 2020/01/08 v3.1.5b (3.1.5b)
)
("C:\Program Files\MiKTeX 2.9\tex/generic/pgf/basiclayer\pgfcorerdf.code.tex"
File: pgfcorerdf.code.tex 2020/01/08 v3.1.5b (3.1.5b)
))) ("C:\Program Files\MiKTeX 2.9\tex/generic/pgf/modules\pgfmoduleshapes.code.
tex"
File: pgfmoduleshapes.code.tex 2020/01/08 v3.1.5b (3.1.5b)
\pgfnodeparttextbox=\box60
) ("C:\Program Files\MiKTeX 2.9\tex/generic/pgf/modules\pgfmoduleplot.code.tex"
File: pgfmoduleplot.code.tex 2020/01/08 v3.1.5b (3.1.5b)
)
("C:\Program Files\MiKTeX 2.9\tex/latex/pgf/compatibility\pgfcomp-version-0-65.
sty"
Package: pgfcomp-version-0-65 2020/01/08 v3.1.5b (3.1.5b)
\pgf@nodesepstart=\dimen274
\pgf@nodesepend=\dimen275
)
("C:\Program Files\MiKTeX 2.9\tex/latex/pgf/compatibility\pgfcomp-version-1-18.
sty"
Package: pgfcomp-version-1-18 2020/01/08 v3.1.5b (3.1.5b)
)) ("C:\Program Files\MiKTeX 2.9\tex/latex/pgf/utilities\pgffor.sty"
("C:\Program Files\MiKTeX 2.9\tex/latex/pgf/utilities\pgfkeys.sty"
("C:\Program Files\MiKTeX 2.9\tex/generic/pgf/utilities\pgfkeys.code.tex"))
("C:\Program Files\MiKTeX 2.9\tex/latex/pgf/math\pgfmath.sty"
("C:\Program Files\MiKTeX 2.9\tex/generic/pgf/math\pgfmath.code.tex"))
("C:\Program Files\MiKTeX 2.9\tex/generic/pgf/utilities\pgffor.code.tex"
Package: pgffor 2020/01/08 v3.1.5b (3.1.5b)

("C:\Program Files\MiKTeX 2.9\tex/generic/pgf/math\pgfmath.code.tex")
\pgffor@iter=\dimen276
\pgffor@skip=\dimen277
\pgffor@stack=\toks46
\pgffor@toks=\toks47
))
("C:\Program Files\MiKTeX 2.9\tex/generic/pgf/frontendlayer/tikz\tikz.code.tex"
Package: tikz 2020/01/08 v3.1.5b (3.1.5b)

("C:\Program Files\MiKTeX 2.9\tex/generic/pgf/libraries\pgflibraryplothandlers.
code.tex"
File: pgflibraryplothandlers.code.tex 2020/01/08 v3.1.5b (3.1.5b)
\pgf@plot@mark@count=\count287
\pgfplotmarksize=\dimen278
)
\tikz@lastx=\dimen279
\tikz@lasty=\dimen280
\tikz@lastxsaved=\dimen281
\tikz@lastysaved=\dimen282
\tikz@lastmovetox=\dimen283
\tikz@lastmovetoy=\dimen284
\tikzleveldistance=\dimen285
\tikzsiblingdistance=\dimen286
\tikz@figbox=\box61
\tikz@figbox@bg=\box62
\tikz@tempbox=\box63
\tikz@tempbox@bg=\box64
\tikztreelevel=\count288
\tikznumberofchildren=\count289
\tikznumberofcurrentchild=\count290
\tikz@fig@count=\count291

("C:\Program Files\MiKTeX 2.9\tex/generic/pgf/modules\pgfmodulematrix.code.tex"
File: pgfmodulematrix.code.tex 2020/01/08 v3.1.5b (3.1.5b)
\pgfmatrixcurrentrow=\count292
\pgfmatrixcurrentcolumn=\count293
\pgf@matrix@numberofcolumns=\count294
)
\tikz@expandcount=\count295

("C:\Program Files\MiKTeX 2.9\tex/generic/pgf/frontendlayer/tikz/libraries\tikz
librarytopaths.code.tex"
File: tikzlibrarytopaths.code.tex 2020/01/08 v3.1.5b (3.1.5b)
)))
("C:\Program Files\MiKTeX 2.9\tex/latex/totcount\totcount.sty"
Package: totcount 2011/01/25 v1.2 package for gettingthe total value of LaTeX c
ounters
)
(Definitions/journalnames.tex)
("C:\Program Files\MiKTeX 2.9\tex/latex/amscls\amsthm.sty"
Package: amsthm 2017/10/31 v2.20.4
\thm@style=\toks48
\thm@bodyfont=\toks49
\thm@headfont=\toks50
\thm@notefont=\toks51
\thm@headpunct=\toks52
\thm@preskip=\skip74
\thm@postskip=\skip75
\thm@headsep=\skip76
\dth@everypar=\toks53
)
\c@theorem=\count296
\c@lemma=\count297
\c@corollary=\count298
\c@proposition=\count299
\c@characterization=\count300
\c@property=\count301
\c@problem=\count302
\c@example=\count303
\c@examplesanddefinitions=\count304
\c@remark=\count305
\c@definition=\count306
\c@hypothesis=\count307
\c@notation=\count308
\c@assumption=\count309

("C:\Program Files\MiKTeX 2.9\tex/latex/hyphenat\hyphenat.sty"
Package: hyphenat 2009/09/02 v2.3c hyphenation utilities
\langwohyphens=\language83
LaTeX Info: Redefining \_ on input line 43.
)
("C:\Program Files\MiKTeX 2.9\tex/latex/natbib\natbib.sty"
Package: natbib 2010/09/13 8.31b (PWD, AO)
\bibhang=\skip77
\bibsep=\skip78
LaTeX Info: Redefining \cite on input line 694.
\c@NAT@ctr=\count310
)
("C:\Program Files\MiKTeX 2.9\tex/latex/hyperref\hyperref.sty"
Package: hyperref 2020/01/14 v7.00d Hypertext links for LaTeX

("C:\Program Files\MiKTeX 2.9\tex/generic/pdfescape\pdfescape.sty"
Package: pdfescape 2019/12/09 v1.15 Implements pdfTeX's escape features (HO)
)
("C:\Program Files\MiKTeX 2.9\tex/latex/hycolor\hycolor.sty"
Package: hycolor 2020-01-27 v1.10 Color options for hyperref/bookmark (HO)
)
("C:\Program Files\MiKTeX 2.9\tex/latex/letltxmacro\letltxmacro.sty"
Package: letltxmacro 2019/12/03 v1.6 Let assignment for LaTeX macros (HO)
)
("C:\Program Files\MiKTeX 2.9\tex/latex/auxhook\auxhook.sty"
Package: auxhook 2019-12-17 v1.6 Hooks for auxiliary files (HO)
)
\@linkdim=\dimen287
\Hy@linkcounter=\count311
\Hy@pagecounter=\count312

("C:\Program Files\MiKTeX 2.9\tex/latex/hyperref\pd1enc.def"
File: pd1enc.def 2020/01/14 v7.00d Hyperref: PDFDocEncoding definition (HO)
Now handling font encoding PD1 ...
... no UTF-8 mapping file for font encoding PD1
)
("C:\Program Files\MiKTeX 2.9\tex/generic/intcalc\intcalc.sty"
Package: intcalc 2019/12/15 v1.3 Expandable calculations with integers (HO)
)
("C:\Program Files\MiKTeX 2.9\tex/generic/etexcmds\etexcmds.sty"
Package: etexcmds 2019/12/15 v1.7 Avoid name clashes with e-TeX commands (HO)
)
\Hy@SavedSpaceFactor=\count313
Package hyperref Info: Option `unicode' set `true' on input line 4421.

("C:\Program Files\MiKTeX 2.9\tex/latex/hyperref\puenc.def"
File: puenc.def 2020/01/14 v7.00d Hyperref: PDF Unicode definition (HO)
Now handling font encoding PU ...
... no UTF-8 mapping file for font encoding PU
)
Package hyperref Info: Option `bookmarksopen' set `true' on input line 4421.
Package hyperref Info: Option `pdffitwindow' set `true' on input line 4421.
Package hyperref Info: Option `colorlinks' set `true' on input line 4421.
Package hyperref Info: Option `hyperfootnotes' set `false' on input line 4421.
Package hyperref Info: Hyper figures OFF on input line 4547.
Package hyperref Info: Link nesting OFF on input line 4552.
Package hyperref Info: Hyper index ON on input line 4555.
Package hyperref Info: Plain pages OFF on input line 4562.
Package hyperref Info: Backreferencing OFF on input line 4567.
Package hyperref Info: Implicit mode ON; LaTeX internals redefined.
Package hyperref Info: Bookmarks ON on input line 4800.
\c@Hy@tempcnt=\count314

("C:\Program Files\MiKTeX 2.9\tex/latex/url\url.sty"
\Urlmuskip=\muskip17
Package: url 2013/09/16  ver 3.4  Verb mode for urls, etc.
)
LaTeX Info: Redefining \url on input line 5159.
\XeTeXLinkMargin=\dimen288

("C:\Program Files\MiKTeX 2.9\tex/generic/bitset\bitset.sty"
Package: bitset 2019/12/09 v1.3 Handle bit-vector datatype (HO)

("C:\Program Files\MiKTeX 2.9\tex/generic/bigintcalc\bigintcalc.sty"
Package: bigintcalc 2019/12/15 v1.5 Expandable calculations on big integers (HO
)
))
\Fld@menulength=\count315
\Field@Width=\dimen289
\Fld@charsize=\dimen290
Package hyperref Info: Hyper figures OFF on input line 6430.
Package hyperref Info: Link nesting OFF on input line 6435.
Package hyperref Info: Hyper index ON on input line 6438.
Package hyperref Info: backreferencing OFF on input line 6445.
Package hyperref Info: Link coloring ON on input line 6448.
Package hyperref Info: Link coloring with OCG OFF on input line 6455.
Package hyperref Info: PDF/A mode OFF on input line 6460.
LaTeX Info: Redefining \ref on input line 6500.
LaTeX Info: Redefining \pageref on input line 6504.

("C:\Program Files\MiKTeX 2.9\tex/generic/atbegshi\atbegshi.sty"
Package: atbegshi 2019/12/05 v1.19 At begin shipout hook (HO)
)
\Hy@abspage=\count316
\c@Item=\count317
)
Package hyperref Info: Driver: hpdftex.

("C:\Program Files\MiKTeX 2.9\tex/latex/hyperref\hpdftex.def"
File: hpdftex.def 2020/01/14 v7.00d Hyperref driver for pdfTeX

("C:\Program Files\MiKTeX 2.9\tex/latex/atveryend\atveryend.sty"
Package: atveryend 2019-12-11 v1.11 Hooks at the very end of document (HO)
)
\Fld@listcount=\count318
\c@bookmark@seq@number=\count319

("C:\Program Files\MiKTeX 2.9\tex/latex/rerunfilecheck\rerunfilecheck.sty"
Package: rerunfilecheck 2019/12/05 v1.9 Rerun checks for auxiliary files (HO)

("C:\Program Files\MiKTeX 2.9\tex/generic/uniquecounter\uniquecounter.sty"
Package: uniquecounter 2019/12/15 v1.4 Provide unlimited unique counter (HO)
)
Package uniquecounter Info: New unique counter `rerunfilecheck' on input line 2
86.
)
\Hy@SectionHShift=\skip79
)
("C:\Program Files\MiKTeX 2.9\tex/latex/footmisc\footmisc.sty"
Package: footmisc 2011/06/06 v5.5b a miscellany of footnote facilities
\FN@temptoken=\toks54
\footnotemargin=\dimen291
\c@pp@next@reset=\count320
Package footmisc Info: Declaring symbol style bringhurst on input line 855.
Package footmisc Info: Declaring symbol style chicago on input line 863.
Package footmisc Info: Declaring symbol style wiley on input line 872.
Package footmisc Info: Declaring symbol style lamport-robust on input line 883.

Package footmisc Info: Declaring symbol style lamport* on input line 903.
Package footmisc Info: Declaring symbol style lamport*-robust on input line 924
.
)
\c@page@totc=\count321

("C:\Program Files\MiKTeX 2.9\tex/latex/geometry\geometry.sty"
Package: geometry 2020/01/02 v5.9 Page Geometry

("C:\Program Files\MiKTeX 2.9\tex/generic/iftex\ifvtex.sty"
Package: ifvtex 2019/10/25 v1.7 ifvtex legacy package. Use iftex instead.
)
\Gm@cnth=\count322
\Gm@cntv=\count323
\c@Gm@tempcnt=\count324
\Gm@bindingoffset=\dimen292
\Gm@wd@mp=\dimen293
\Gm@odd@mp=\dimen294
\Gm@even@mp=\dimen295
\Gm@layoutwidth=\dimen296
\Gm@layoutheight=\dimen297
\Gm@layouthoffset=\dimen298
\Gm@layoutvoffset=\dimen299
\Gm@dimlist=\toks55

("C:\Program Files\MiKTeX 2.9\tex/latex/geometry\geometry.cfg"))
("C:\Program Files\MiKTeX 2.9\tex/latex/newfloat\newfloat.sty"
Package: newfloat 2019/09/02 v1.1l Defining new floating environments (AR)
)
Package newfloat Info: New float `listing' with options `' on input line 985.
\c@listing=\count325
Package newfloat Info: float type `listing'=4 on input line 985.
Package newfloat Info: New float `boxenv' with options `name=Box' on input line
 986.
\c@boxenv=\count326
Package newfloat Info: float type `boxenv'=8 on input line 986.
Package newfloat Info: New float `chart' with options `' on input line 987.
\c@chart=\count327
Package newfloat Info: float type `chart'=16 on input line 987.
Package newfloat Info: New float `scheme' with options `' on input line 988.
\c@scheme=\count328
Package newfloat Info: float type `scheme'=32 on input line 988.

("C:\Program Files\MiKTeX 2.9\tex/latex/caption\caption.sty"
Package: caption 2020/01/03 v3.4h Customizing captions (AR)

("C:\Program Files\MiKTeX 2.9\tex/latex/caption\caption3.sty"
Package: caption3 2020/01/03 v1.8h caption3 kernel (AR)
Package caption3 Info: TeX engine: e-TeX on input line 61.
\captionmargin=\dimen300
\captionmargin@=\dimen301
\captionwidth=\dimen302
\caption@tempdima=\dimen303
\caption@indent=\dimen304
\caption@parindent=\dimen305
\caption@hangindent=\dimen306
Package caption Info: Standard document class detected.
)
\c@caption@flags=\count329
\c@continuedfloat=\count330
Package caption Info: float package is loaded.
Package caption Info: hyperref package is loaded.
)
\@justcentbox=\box65
\wideitemsep=\skip80
)
("C:\Program Files\MiKTeX 2.9\tex/latex/l3backend\l3backend-pdfmode.def"
File: l3backend-pdfmode.def 2020-02-23 L3 backend support: PDF mode
\l__kernel_color_stack_int=\count331
\l__pdf_internal_box=\box66
)
(supp.aux)
\openout1 = `supp.aux'.

LaTeX Font Info:    Checking defaults for OML/cmm/m/it on input line 132.
LaTeX Font Info:    ... okay on input line 132.
LaTeX Font Info:    Checking defaults for OMS/cmsy/m/n on input line 132.
LaTeX Font Info:    ... okay on input line 132.
LaTeX Font Info:    Checking defaults for OT1/cmr/m/n on input line 132.
LaTeX Font Info:    ... okay on input line 132.
LaTeX Font Info:    Checking defaults for T1/cmr/m/n on input line 132.
LaTeX Font Info:    ... okay on input line 132.
LaTeX Font Info:    Checking defaults for TS1/cmr/m/n on input line 132.
LaTeX Font Info:    ... okay on input line 132.
LaTeX Font Info:    Checking defaults for OMX/cmex/m/n on input line 132.
LaTeX Font Info:    ... okay on input line 132.
LaTeX Font Info:    Checking defaults for U/cmr/m/n on input line 132.
LaTeX Font Info:    ... okay on input line 132.
LaTeX Font Info:    Checking defaults for PD1/pdf/m/n on input line 132.
LaTeX Font Info:    ... okay on input line 132.
LaTeX Font Info:    Checking defaults for PU/pdf/m/n on input line 132.
LaTeX Font Info:    ... okay on input line 132.
LaTeX Font Info:    Trying to load font information for T1+ppl on input line 13
2.
 ("C:\Program Files\MiKTeX 2.9\tex/latex/psnfss\t1ppl.fd"
File: t1ppl.fd 2001/06/04 font definitions for T1/ppl.
)
("C:\Program Files\MiKTeX 2.9\tex/context/base/mkii\supp-pdf.mkii"
[Loading MPS to PDF converter (version 2006.09.02).]
\scratchcounter=\count332
\scratchdimen=\dimen307
\scratchbox=\box67
\nofMPsegments=\count333
\nofMParguments=\count334
\everyMPshowfont=\toks56
\MPscratchCnt=\count335
\MPscratchDim=\dimen308
\MPnumerator=\count336
\makeMPintoPDFobject=\count337
\everyMPtoPDFconversion=\toks57
)
Package lastpage Info: Please have a look at the pageslts package at
(lastpage)             https://www.ctan.org/pkg/pageslts
(lastpage)             ! on input line 132.
LaTeX Info: Redefining \microtypecontext on input line 132.
Package microtype Info: Generating PDF output.
Package microtype Info: Character protrusion enabled (level 2).
Package microtype Info: Using default protrusion set `alltext'.
Package microtype Info: Automatic font expansion enabled (level 2),
(microtype)             stretch: 20, shrink: 20, step: 1, non-selected.
Package microtype Info: Using default expansion set `basictext'.
LaTeX Info: Redefining \showhyphens on input line 132.
Package microtype Info: No adjustment of tracking.
Package microtype Info: No adjustment of interword spacing.
Package microtype Info: No adjustment of character kerning.
 ("C:\Program Files\MiKTeX 2.9\tex/latex/microtype\mt-ppl.cfg"
File: mt-ppl.cfg 2005/11/16 v1.6 microtype config. file: Palatino (RS)
)
ABD: EveryShipout initializing macros
\AtBeginShipoutBox=\box68
Package hyperref Info: Link coloring ON on input line 132.

("C:\Program Files\MiKTeX 2.9\tex/latex/hyperref\nameref.sty"
Package: nameref 2019/09/16 v2.46 Cross-referencing by name of section

("C:\Program Files\MiKTeX 2.9\tex/latex/refcount\refcount.sty"
Package: refcount 2019/12/15 v3.6 Data extraction from label references (HO)
)
("C:\Program Files\MiKTeX 2.9\tex/generic/gettitlestring\gettitlestring.sty"
Package: gettitlestring 2019/12/15 v1.6 Cleanup title references (HO)
)
\c@section@level=\count338
)
LaTeX Info: Redefining \ref on input line 132.
LaTeX Info: Redefining \pageref on input line 132.
LaTeX Info: Redefining \nameref on input line 132.

(supp.out) (supp.out)
\@outlinefile=\write4
\openout4 = `supp.out'.

\symAMSb=\mathgroup5

*geometry* detected driver: pdftex
*geometry* verbose mode - [ preamble ] result:
* driver: pdftex
* paper: <default>
* layout: <same size as paper>
* layoutoffset:(h,v)=(0.0pt,0.0pt)
* modes: includehead includefoot 
* h-part:(L,W,R)=(76.82234pt, 443.86319pt, 76.82234pt)
* v-part:(T,H,B)=(51.21504pt, 751.15268pt, 42.67912pt)
* \paperwidth=597.50787pt
* \paperheight=845.04684pt
* \textwidth=443.86319pt
* \textheight=684.15268pt
* \oddsidemargin=4.55235pt
* \evensidemargin=4.55235pt
* \topmargin=-21.05495pt
* \headheight=12.0pt
* \headsep=25.0pt
* \topskip=10.0pt
* \footskip=30.0pt
* \marginparwidth=57.0pt
* \marginparsep=11.0pt
* \columnsep=10.0pt
* \skip\footins=34.14322pt
* \hoffset=0.0pt
* \voffset=0.0pt
* \mag=1000
* \@twocolumnfalse
* \@twosidefalse
* \@mparswitchfalse
* \@reversemarginfalse
* (1in=72.27pt=25.4mm, 1cm=28.453pt)

Package newfloat Info: `float' package detected.
Package caption Info: Begin \AtBeginDocument code.
Package caption Info: End \AtBeginDocument code.
LaTeX Font Info:    Trying to load font information for OT1+ppl on input line 1
32.
("C:\Program Files\MiKTeX 2.9\tex/latex/psnfss\ot1ppl.fd"
File: ot1ppl.fd 2001/06/04 font definitions for OT1/ppl.
)
LaTeX Font Info:    Trying to load font information for OML+zplm on input line 
132.

("C:\Program Files\MiKTeX 2.9\tex/latex/psnfss\omlzplm.fd"
File: omlzplm.fd 2002/09/08 Fontinst v1.914 font definitions for OML/zplm.
)
LaTeX Font Info:    Trying to load font information for OMS+zplm on input line 
132.

("C:\Program Files\MiKTeX 2.9\tex/latex/psnfss\omszplm.fd"
File: omszplm.fd 2002/09/08 Fontinst v1.914 font definitions for OMS/zplm.
)
LaTeX Font Info:    Trying to load font information for OMX+zplm on input line 
132.

("C:\Program Files\MiKTeX 2.9\tex/latex/psnfss\omxzplm.fd"
File: omxzplm.fd 2002/09/08 Fontinst v1.914 font definitions for OMX/zplm.
)
LaTeX Font Info:    Trying to load font information for OT1+zplm on input line 
132.

("C:\Program Files\MiKTeX 2.9\tex/latex/psnfss\ot1zplm.fd"
File: ot1zplm.fd 2002/09/08 Fontinst v1.914 font definitions for OT1/zplm.
)
Package microtype Info: Loading generic protrusion settings for font family
(microtype)             `zplm' (encoding: OT1).
(microtype)             For optimal results, create family-specific settings.
(microtype)             See the microtype manual for details.
LaTeX Font Info:    Font shape `U/msb/m/n' will be
(Font)              scaled to size 10.42007pt on input line 132.

("C:\Program Files\MiKTeX 2.9\tex/latex/microtype\mt-msb.cfg"
File: mt-msb.cfg 2005/06/01 v1.0 microtype config. file: AMS symbols (b) (RS)
)
LaTeX Font Info:    Font shape `U/msb/m/n' will be
(Font)              scaled to size 7.91925pt on input line 132.
LaTeX Font Info:    Font shape `U/msb/m/n' will be
(Font)              scaled to size 6.25204pt on input line 132.
Package epstopdf Info: Source file: <Definitions/logo-orcid.eps>
(epstopdf)                    date: 2021-04-27 02:45:26
(epstopdf)                    size: 12502 bytes
(epstopdf)             Output file: <Definitions/logo-orcid-eps-converted-to.pd
f>
(epstopdf)                    date: 2021-04-27 08:37:51
(epstopdf)                    size: 2839 bytes
(epstopdf)             Command: <epstopdf --outfile=Definitions/logo-orcid-eps-
converted-to.pdf Definitions/logo-orcid.eps>
(epstopdf)             \includegraphics on input line 132.
Package epstopdf Info: Output file is already uptodate.


pdfTeX warning: miktex-pdftex.exe (file ./Definitions/logo-orcid-eps-converted-
to.pdf): PDF inclusion: found PDF version <1.7>, but at most version <1.5> allo
wed
<Definitions/logo-orcid-eps-converted-to.pdf, id=19, 102.3825pt x 102.3825pt>
File: Definitions/logo-orcid-eps-converted-to.pdf Graphic file (type pdf)
<use Definitions/logo-orcid-eps-converted-to.pdf>
Package pdftex.def Info: Definitions/logo-orcid-eps-converted-to.pdf  used on i
nput line 132.
(pdftex.def)             Requested size: 9.10509pt x 9.10466pt.
Package epstopdf Info: Source file: <Definitions/logo-orcid.eps>
(epstopdf)                    date: 2021-04-27 02:45:26
(epstopdf)                    size: 12502 bytes
(epstopdf)             Output file: <Definitions/logo-orcid-eps-converted-to.pd
f>
(epstopdf)                    date: 2021-04-27 08:37:51
(epstopdf)                    size: 2839 bytes
(epstopdf)             Command: <epstopdf --outfile=Definitions/logo-orcid-eps-
converted-to.pdf Definitions/logo-orcid.eps>
(epstopdf)             \includegraphics on input line 132.
Package epstopdf Info: Output file is already uptodate.
File: Definitions/logo-orcid-eps-converted-to.pdf Graphic file (type pdf)
<use Definitions/logo-orcid-eps-converted-to.pdf>
Package pdftex.def Info: Definitions/logo-orcid-eps-converted-to.pdf  used on i
nput line 132.
(pdftex.def)             Requested size: 9.10509pt x 9.10466pt.
Package epstopdf Info: Source file: <Definitions/logo-orcid.eps>
(epstopdf)                    date: 2021-04-27 02:45:26
(epstopdf)                    size: 12502 bytes
(epstopdf)             Output file: <Definitions/logo-orcid-eps-converted-to.pd
f>
(epstopdf)                    date: 2021-04-27 08:37:51
(epstopdf)                    size: 2839 bytes
(epstopdf)             Command: <epstopdf --outfile=Definitions/logo-orcid-eps-
converted-to.pdf Definitions/logo-orcid.eps>
(epstopdf)             \includegraphics on input line 132.
Package epstopdf Info: Output file is already uptodate.
File: Definitions/logo-orcid-eps-converted-to.pdf Graphic file (type pdf)
<use Definitions/logo-orcid-eps-converted-to.pdf>
Package pdftex.def Info: Definitions/logo-orcid-eps-converted-to.pdf  used on i
nput line 132.
(pdftex.def)             Requested size: 9.10509pt x 9.10466pt.
Package epstopdf Info: Source file: <RX_PAPER_FIGS1.eps>
(epstopdf)                    date: 2021-04-27 02:45:24
(epstopdf)                    size: 3834168 bytes
(epstopdf)             Output file: <RX_PAPER_FIGS1-eps-converted-to.pdf>
(epstopdf)                    date: 2021-04-27 08:37:59
(epstopdf)                    size: 60768 bytes
(epstopdf)             Command: <epstopdf --outfile=RX_PAPER_FIGS1-eps-converte
d-to.pdf RX_PAPER_FIGS1.eps>
(epstopdf)             \includegraphics on input line 138.
Package epstopdf Info: Output file is already uptodate.


pdfTeX warning: miktex-pdftex.exe (file ./RX_PAPER_FIGS1-eps-converted-to.pdf):
 PDF inclusion: found PDF version <1.7>, but at most version <1.5> allowed
<RX_PAPER_FIGS1-eps-converted-to.pdf, id=22, 702.625pt x 903.375pt>
File: RX_PAPER_FIGS1-eps-converted-to.pdf Graphic file (type pdf)
<use RX_PAPER_FIGS1-eps-converted-to.pdf>
Package pdftex.def Info: RX_PAPER_FIGS1-eps-converted-to.pdf  used on input lin
e 138.
(pdftex.def)             Requested size: 426.79134pt x 548.74217pt.
[1{C:/Users/MDPI/AppData/Local/MiKTeX/2.9/pdftex/config/pdftex.map}

 <./Definitions/logo-orcid-eps-converted-to.pdf> <./RX_PAPER_FIGS1-eps-converte
d-to.pdf>]
Package epstopdf Info: Source file: <RX_PAPER_FIGS2_DNR.eps>
(epstopdf)                    date: 2021-04-27 02:45:24
(epstopdf)                    size: 1283213 bytes
(epstopdf)             Output file: <RX_PAPER_FIGS2_DNR-eps-converted-to.pdf>
(epstopdf)                    date: 2021-04-27 08:38:02
(epstopdf)                    size: 37425 bytes
(epstopdf)             Command: <epstopdf --outfile=RX_PAPER_FIGS2_DNR-eps-conv
erted-to.pdf RX_PAPER_FIGS2_DNR.eps>
(epstopdf)             \includegraphics on input line 146.
Package epstopdf Info: Output file is already uptodate.


pdfTeX warning: miktex-pdftex.exe (file ./RX_PAPER_FIGS2_DNR-eps-converted-to.p
df): PDF inclusion: found PDF version <1.7>, but at most version <1.5> allowed
<RX_PAPER_FIGS2_DNR-eps-converted-to.pdf, id=41, 903.375pt x 702.625pt>
File: RX_PAPER_FIGS2_DNR-eps-converted-to.pdf Graphic file (type pdf)
<use RX_PAPER_FIGS2_DNR-eps-converted-to.pdf>
Package pdftex.def Info: RX_PAPER_FIGS2_DNR-eps-converted-to.pdf  used on input
 line 146.
(pdftex.def)             Requested size: 455.24408pt x 354.08841pt.

Overfull \hbox (11.38089pt too wide) in paragraph at lines 146--147
 [][] 
 []

[2]
Package epstopdf Info: Source file: <RX_PAPER_FIGS3_DNR.eps>
(epstopdf)                    date: 2021-04-27 02:45:24
(epstopdf)                    size: 3834172 bytes
(epstopdf)             Output file: <RX_PAPER_FIGS3_DNR-eps-converted-to.pdf>
(epstopdf)                    date: 2021-04-27 08:38:10
(epstopdf)                    size: 115570 bytes
(epstopdf)             Command: <epstopdf --outfile=RX_PAPER_FIGS3_DNR-eps-conv
erted-to.pdf RX_PAPER_FIGS3_DNR.eps>
(epstopdf)             \includegraphics on input line 153.
Package epstopdf Info: Output file is already uptodate.


pdfTeX warning: miktex-pdftex.exe (file ./RX_PAPER_FIGS3_DNR-eps-converted-to.p
df): PDF inclusion: found PDF version <1.7>, but at most version <1.5> allowed
<RX_PAPER_FIGS3_DNR-eps-converted-to.pdf, id=49, 903.375pt x 702.625pt>
File: RX_PAPER_FIGS3_DNR-eps-converted-to.pdf Graphic file (type pdf)
<use RX_PAPER_FIGS3_DNR-eps-converted-to.pdf>
Package pdftex.def Info: RX_PAPER_FIGS3_DNR-eps-converted-to.pdf  used on input
 line 153.
(pdftex.def)             Requested size: 455.24408pt x 354.08841pt.

Overfull \hbox (11.38089pt too wide) in paragraph at lines 153--154
 [][] 
 []

[3 <./RX_PAPER_FIGS2_DNR-eps-converted-to.pdf>]
LaTeX Font Info:    Font shape `U/msb/m/n' will be
(Font)              scaled to size 9.37807pt on input line 160.
LaTeX Font Info:    Font shape `U/msb/m/n' will be
(Font)              scaled to size 7.29405pt on input line 160.
LaTeX Font Info:    Font shape `U/msb/m/n' will be
(Font)              scaled to size 5.21004pt on input line 160.


AED: lastpage setting LastPage
[4 <./RX_PAPER_FIGS3_DNR-eps-converted-to.pdf>]
Package atveryend Info: Empty hook `BeforeClearDocument' on input line 238.
Package atveryend Info: Empty hook `AfterLastShipout' on input line 238.
 (supp.aux)
Package atveryend Info: Executing hook `AtVeryEndDocument' on input line 238.
Package atveryend Info: Executing hook `AtEndAfterFileList' on input line 238.
Package rerunfilecheck Info: File `supp.out' has not changed.
(rerunfilecheck)             Checksum: 184ED7CEA5254D576C8C12847125CB6A;552.
 ) 
Here is how much of TeX's memory you used:
 25910 strings out of 480894
 450433 string characters out of 2908240
 729750 words of memory out of 3000000
 41217 multiletter control sequences out of 15000+200000
 570682 words of font info for 147 fonts, out of 3000000 for 9000
 1141 hyphenation exceptions out of 8191
 68i,12n,64p,2574b,452s stack positions out of 5000i,500n,10000p,200000b,50000s
{C:/Program Files/MiKTeX 2.9/fonts/enc/dvips/base/8r.enc}<C:/Program Files/Mi
KTeX 2.9/fonts/type1/public/amsfonts/cm/cmbsy10.pfb><C:/Program Files/MiKTeX 2.
9/fonts/type1/urw/palatino/uplb8a.pfb><C:/Program Files/MiKTeX 2.9/fonts/type1/
urw/palatino/uplr8a.pfb><C:/Program Files/MiKTeX 2.9/fonts/type1/urw/palatino/u
plri8a.pfb>
Output written on supp.pdf (4 pages, 287861 bytes).
PDF statistics:
 86 PDF objects out of 1000 (max. 8388607)
 12 named destinations out of 1000 (max. 500000)
 31289 words of extra memory for PDF output out of 35830 (max. 10000000)
