# Supplementary material
Source: MDPI journal article supplement (https://www.mdpi.com/2571-6255/4/2/19)
Supplement: s1 [file s1 › fire-1164930-supp/supp.out]

\BOOKMARK [1][]{section.1}{\376\377\000D\000a\000t\000a\000\040\000f\000i\000l\000t\000e\000r\000i\000n\000g}{}% 1
\BOOKMARK [1][]{section.2}{\376\377\000A\000c\000c\000o\000m\000p\000l\000i\000s\000h\000e\000d\000\040\000v\000e\000r\000s\000u\000s\000\040\000p\000r\000o\000p\000o\000s\000e\000d\000\040\000b\000u\000r\000n\000\040\000l\000e\000v\000e\000l\000s}{}% 2
\BOOKMARK [1][]{section.3}{\376\377\000I\000n\000t\000e\000r\000a\000n\000n\000u\000a\000l\000\040\000b\000o\000x\000c\000o\000x\000\040\000a\000n\000a\000l\000y\000s\000i\000s}{}% 3
