# Supplementary material
Source: MDPI journal article supplement (https://www.mdpi.com/2571-6255/4/2/19)
Supplement: s1 [file s1 › fire-1164930-supp/supp.tex]

%  LaTeX support: latex@mdpi.com 
%  In case you need support, please attach all files that are necessary for compiling as well as the log file, and specify the details of your LaTeX setup (which operating system and LaTeX version / tools you are using).

%=================================================================
\documentclass[fire,supfile,accept,moreauthors,pdftex]{Definitions/mdpi} 

% If you would like to post an early version of this manuscript as a preprint, you may use preprint as the journal and change 'submit' to 'accept'. The document class line would be, e.g., \documentclass[preprints,article,accept,moreauthors,pdftex]{mdpi}. This is especially recommended for submission to arXiv, where line numbers should be removed before posting. For preprints.org, the editorial staff will make this change immediately prior to posting.

%--------------------
% Class Options:
%--------------------
%----------
% journal
%----------
% Choose between the following MDPI journals:
% acoustics, actuators, addictions, admsci, aerospace, agriculture, agriengineering, agronomy, algorithms, animals, antibiotics, antibodies, antioxidants, applsci, arts, asc, asi, atmosphere, atoms, axioms, batteries, bdcc, behavsci , beverages, bioengineering, biology, biomedicines, biomimetics, biomolecules, biosensors, brainsci , buildings, cancers, carbon , catalysts, cells, ceramics, challenges, chemengineering, chemistry, chemosensors, children, cleantechnol, climate, clockssleep, cmd, coatings, colloids, computation, computers, condensedmatter, cosmetics, cryptography, crystals, dairy, data, dentistry, designs , diagnostics, diseases, diversity, drones, econometrics, economies, education, ejihpe, electrochem, electronics, energies, entropy, environments, epigenomes, est, fermentation, fibers, fire, fishes, fluids, foods, forecasting, forests, fractalfract, futureinternet, futurephys, galaxies, games, gastrointestdisord, gels, genealogy, genes, geohazards, geosciences, geriatrics, hazardousmatters, healthcare, heritage, highthroughput, horticulturae, humanities, hydrology, ijerph, ijfs, ijgi, ijms, ijns, ijtpp, informatics, information, infrastructures, inorganics, insects, instruments, inventions, iot, j, jcdd, jcm, jcp, jcs, jdb, jfb, jfmk, jimaging, jintelligence, jlpea, jmmp, jmse, jnt, jof, joitmc, jpm, jrfm, jsan, land, languages, laws, life, literature, logistics, lubricants, machines, magnetochemistry, make, marinedrugs, materials, mathematics, mca, medicina, medicines, medsci, membranes, metabolites, metals, microarrays, micromachines, microorganisms, minerals, modelling, molbank, molecules, mps, mti, nanomaterials, ncrna, neuroglia, nitrogen, notspecified, nutrients, ohbm, optics, particles, pathogens, pharmaceuticals, pharmaceutics, pharmacy, philosophies, photonics, physics, plants, plasma, polymers, polysaccharides, preprints , proceedings, processes, proteomes, psych, publications, quantumrep, quaternary, qubs, reactions, recycling, religions, remotesensing, reports, resources, risks, robotics, safety, sci, scipharm, sensors, separations, sexes, signals, sinusitis, smartcities, sna, societies, socsci, soilsystems, sports, standards, stats, surfaces, surgeries, sustainability, symmetry, systems, technologies, test, toxics, toxins, tropicalmed, universe, urbansci, vaccines, vehicles, vetsci, vibration, viruses, vision, water, wem, wevj

%---------
% article
%---------
% The default type of manuscript is "article", but can be replaced by: 
% abstract, addendum, article, benchmark, book, bookreview, briefreport, casereport, changes, comment, commentary, communication, conceptpaper, conferenceproceedings, correction, conferencereport, expressionofconcern, extendedabstract, meetingreport, creative, datadescriptor, discussion, editorial, essay, erratum, hypothesis, interestingimages, letter, meetingreport, newbookreceived, obituary, opinion, projectreport, reply, retraction, review, perspective, protocol, shortnote, supfile, technicalnote, viewpoint
% supfile = supplementary materials

%----------
% submit
%----------
% The class option "submit" will be changed to "accept" by the Editorial Office when the paper is accepted. This will only make changes to the frontpage (e.g., the logo of the journal will get visible), the headings, and the copyright information. Also, line numbering will be removed. Journal info and pagination for accepted papers will also be assigned by the Editorial Office.

%------------------
% moreauthors
%------------------
% If there is only one author the class option oneauthor should be used. Otherwise use the class option moreauthors.

%---------
% pdftex
%---------
% The option pdftex is for use with pdfLaTeX. If eps figures are used, remove the option pdftex and use LaTeX and dvi2pdf.

%=================================================================
\firstpage{1} 
\makeatletter 
\setcounter{page}{\@firstpage} 
\makeatother
\pubvolume{xx}
\issuenum{1}
\articlenumber{5}
\pubyear{2019}
\copyrightyear{2019}
%\externaleditor{Academic Editor: name}
\history{Received: date; Accepted: date; Published: date}
%\updates{yes} % If there is an update available, un-comment this line

%% MDPI internal command: uncomment if new journal that already uses continuous page numbers 
%\continuouspages{yes}

%------------------------------------------------------------------
% The following line should be uncommented if the LaTeX file is uploaded to arXiv.org
%\pdfoutput=1

%=================================================================
% Add packages and commands here. The following packages are loaded in our class file: fontenc, calc, indentfirst, fancyhdr, graphicx, lastpage, ifthen, lineno, float, amsmath, setspace, enumitem, mathpazo, booktabs, titlesec, etoolbox, amsthm, hyphenat, natbib, hyperref, footmisc, geometry, caption, url, mdframed, tabto, soul, multirow, microtype, tikz

%=================================================================
%% Please use the following mathematics environments: Theorem, Lemma, Corollary, Proposition, Characterization, Property, Problem, Example, ExamplesandDefinitions, Hypothesis, Remark, Definition, Notation, Assumption
%% For proofs, please use the proof environment (the amsthm package is loaded by the MDPI class).

%=================================================================
% Full title of the paper (Capitalized)
\Title{Spatiotemporal prescribed fire patterns in Washington State, USA}

% Author Orchid ID: enter ID or remove command
\newcommand{\orcidauthorA}{0000-0001-5776-486X}
\newcommand{\orcidauthorB}{0000-0003-4023-3514}
\newcommand{\orcidauthorC}{0000-0002-9606-9963}% Add \orcidA{} behind the author's name
%\newcommand{\orcidauthorB}{0000-0000-000-000X} % Add \orcidB{} behind the author's name

% Authors, for the paper (add full first names)
\Author{Harry Podschwit $^{1,\dagger*}$\orcidA{}, Colton Miller $^{1,\dagger}$\orcidB{} and Ernesto Alvarado $^{2,}$\orcidC{}}

% Authors, for metadata in PDF
\AuthorNames{Firstname Lastname, Firstname Lastname and Firstname Lastname}

% Affiliations / Addresses (Add [1] after \address if there is only one affiliation.)
\address{%
$^{1}$ \quad University of Washington; hpodschwit@gmail.com\\
$^{2}$ \quad Affiliation 2; e-mail@e-mail.com}

% Contact information of the corresponding author
\corres{Correspondence: hpodschwit@gmail.com;}

% Current address and/or shared authorship
\firstnote{These authors contributed equally to this work.} 
% The commands \thirdnote{} till \eighthnote{} are available for further notes

%\simplesumm{} % Simple summary

%\conference{} % An extended version of a conference paper

% Abstract (Do not insert blank lines, i.e. \\) 
\abstract{In this study, we examine the regional trends and patterns of intentional fire use within Washington state using Smoke management requests from the Department of Natural Resources. We estimated the average yearly change in five parameters of intentional fire use: total area burned, total biomass burned, burn days, burn approval rates, and pile burn frequency. We also identified the months in which these five parameters were expected to peak. Lastly, we described how area burned, biomass burned, and pile burn frequency differed between approved and not approved by the Department of Natural Resources. We found that intentional fire use has generally decreased over the 2004-2019 time period, but there was variability across regions, parameters, and year. We also found that intentional fire use tended to peak in the fall months, with a smaller peak often occurring in the spring. Lastly we found that intentional fires approved for burning by the Department of Natural Resources were smaller and burned less biomass than not approved fires.}

% Keywords
\keyword{Prescribed fire; smoke; Washington; controlled burning; pile burning;}

% The fields PACS, MSC, and JEL may be left empty or commented out if not applicable
%\PACS{J0101}
%\MSC{}
%\JEL{}

%%%%%%%%%%%%%%%%%%%%%%%%%%%%%%%%%%%%%%%%%%
% Only for the journal Diversity
%\LSID{\url{http://}}

%%%%%%%%%%%%%%%%%%%%%%%%%%%%%%%%%%%%%%%%%%
% Only for the journal Applied Sciences:
%\featuredapplication{Authors are encouraged to provide a concise description of the specific application or a potential application of the work. This section is not mandatory.}
%%%%%%%%%%%%%%%%%%%%%%%%%%%%%%%%%%%%%%%%%%

%%%%%%%%%%%%%%%%%%%%%%%%%%%%%%%%%%%%%%%%%%
% Only for the journal Data:
%\dataset{DOI number or link to the deposited data set in cases where the data set is published or set to be published separately. If the data set is submitted and will be published as a supplement to this paper in the journal Data, this field will be filled by the editors of the journal. In this case, please make sure to submit the data set as a supplement when entering your manuscript into our manuscript editorial system.}

%\datasetlicense{license under which the data set is made available (CC0, CC-BY, CC-BY-SA, CC-BY-NC, etc.)}

%%%%%%%%%%%%%%%%%%%%%%%%%%%%%%%%%%%%%%%%%%
% Only for the journal Toxins
%\keycontribution{The breakthroughs or highlights of the manuscript. Authors can write one or two sentences to describe the most important part of the paper.}

%\setcounter{secnumdepth}{4}
%%%%%%%%%%%%%%%%%%%%%%%%%%%%%%%%%%%%%%%%%%
\begin{document}
%%%%%%%%%%%%%%%%%%%%%%%%%%%%%%%%%%%%%%%%%%

\section{Data filtering}
 \begin{figure}[H]
\centering
\includegraphics[width=15 cm]{RX_PAPER_FIGS1.eps}
\caption{Scatterplot of actual versus proposed area (a) and volume (b) with a 1-1 line overlaid.}
\end{figure} 
\section{Accomplished versus proposed burn levels} 
Although ideally accomplished acreage and tonnage would be used, for practical purposes, the analysis used proposed area burned and tonnage. The data available suggested that in many cases, for whatever reason, the accomplished levels of burning differed from that which was proposed. It is then prudent to determine the level at which these quantities differ as to contextualize our results that were based on the proposed quantities. In some regions the assumption that the proposed levels of burning is approximately equivalent to the accomplished levels is reasonable. In the NW for instance, the accomplished burned area was equal to the proposed burned area in 87 percent of the requests with data, and the accomplished burned volume was equivalent to the proposed volume in 86 percent of requests with data. In contrast, in the SE it was fairly common that the accomplished burning levels were smaller than the proposed, with only 46 percent of fires accomplishing the proposed area burned and only 43 percent of fires accomplishing the proposed biomass burned. Hence, the suitability of this assumption varied regionally (Figure  ~\ref{fig:completion}). However, in all but region, >53 percent of the burns had exact agreement between the accomplished and proposed burning levels. Additionally, in every region, the expected ratios between accomplished and proposed values - for both area and volume - were greater 0.6. In other words, on average more than >60 percent of what was proposed by fire managers was actually burned in all regions. Hence, if complete accomplished data were available, the revised quantities would likely be only nominally less than those already reported in most cases. Additionally, with only a few exceptions, the ratio between accomplished and proposed quantities did not vary strongly across years or the season. In a few rare cases, the accomplished quantity burned exceeded what was proposed, resulting in individual years with higher ratios than what would be expected relative to other years. Seasonal biases associated with interpreting proposed quantities as accomplished also occurred, particularly in the SE where the ratio between accomplished and proposed burning commonly dipped in the summer (Figure  ~\ref{fig:completion_season}). Although this could lead to biases, the burning during this time was already very low compared to the rest of the year, and we would expect to draw similar conclusions to those already reported if the accomplished quantities were consistently available. 

\begin{figure}[H]
\centering
\includegraphics[width=16 cm]{RX_PAPER_FIGS2_DNR.eps}
\caption{The empirical cumulative distribution function of the ratio between accomplished and proposed burn area and burned volume for each region. The probability that an approved fire burns nothing is denoted on the left of each panel, and the probability that an approved fire burns all of what was proposed is denoted on the right of each panel. The expected ratio is identified with a plus sign on the x-axis. Note Northeast (NE), Northwest (NW), Olympic (OLY), Pacific Coast (PC), South Puget Sound (SPS), and Southeast (SE).}
\label{fig:completion}
\end{figure}

\begin{figure}[H]
\centering
\includegraphics[width=16 cm]{RX_PAPER_FIGS3_DNR.eps}
\caption{The expected ratio between accomplished and proposed area at annual (a) and monthly (b) timesteps and the expected ratio between accomplished and proposed volume disaggregated by year (c) and month (d).}
\label{fig:completion_season}
\end{figure}

\section{Interannual boxcox analysis}
\begin{table}[H]
\caption{Best data transformation in five prescribed fire parameters from 2004-2019 for each DNR administrative region (Northeast (NE), Northwest (NW), Olympic (OLY), Pacific Coast (PC), South Puget Sound (SPS), and Southeast (SE)). The percent change in the unadjusted $R^2$ when substituting the nonlinear model for the linear one are reported in the parenthesis. Note that the data-transformations rarely improved the ability of the models to predict historical prescribed fire data.}
\centering
 %%\tablesize{\footnotesize} %% You can specify the fontsize here, e.g., \tablesize{\footnotesize}. If commented out \small will be used.
\begin{tabular}{cccccc}
\toprule
\textbf{Region}	&
\textbf{Area} &
\textbf{Burn days} &
\textbf{Biomass} &
\textbf{Approvals} &
\textbf{Pile} \\
\midrule
NE	&
log (-7.39\%)&
identity (0\%) &
inverse (-24.84\%) &
identity (0\%) &
identity (0\%)\\
NW	&
log (-66.28\%) &
identity (0\%) &
log (-8.39\%) &
log (0\%) &
identity (0\%) \\
OLY	&
log (-20.41\%) &
inverse (0.04\%) &
identity (0\%) &
identity (0\%) &
identity (0\%)\\
PC	&
identity (0\%)&
identity (0\%) &
sqrt (-9.43\%) &
identity (0\%) &
identity (0\%)\\
SPS	&
inverse (-194.25\%) &
log (0.04\%) &
inverse (-107.71\%) &
sqrt (0\%) &
identity (0\%)\\
SE	&
inverse (18.14\%) &
identity (0\%) &
log (-6.5\%) &
log (0\%) &
squared (0\%)\\
\bottomrule
\end{tabular}
\label{table:trend}
\end{table}

%\begin{listing}[H]
%\caption{Title of the listing}
%\rule{\textwidth}{1pt}
%\raggedright Text of the listing. In font size footnotesize, small, or normalsize. Preferred format: left aligned and single spaced. Preferred border format: top border line and bottom border line.
%\rule{\textwidth}{1pt}
%\end{listing}

% The following MDPI journals use author-date citation: Arts, Econometrics, Economies, Genealogy, Humanities, IJFS, JRFM, Laws, Religions, Risks, Social Sciences. For those journals, please follow the formatting guidelines on http://www.mdpi.com/authors/references
% To cite two works by the same author: \citeauthor{ref-journal-1a} (\citeyear{ref-journal-1a}, \citeyear{ref-journal-1b}). This produces: Whittaker (1967, 1975)
% To cite two works by the same author with specific pages: \citeauthor{ref-journal-3a} (\citeyear{ref-journal-3a}, p. 328; \citeyear{ref-journal-3b}, p.475). This produces: Wong (1999, p. 328; 2000, p. 475)

%=====================================
% References, variant B: external bibliography
%=====================================
%\externalbibliography{yes}
%\bibliography{your_external_BibTeX_file}

%% for journal Sci
%\reviewreports{\\
%Reviewer 1 comments and authors’ response\\
%Reviewer 2 comments and authors’ response\\
%Reviewer 3 comments and authors’ response
%}

%%%%%%%%%%%%%%%%%%%%%%%%%%%%%%%%%%%%%%%%%%
\end{document}
