# Supplementary material
Source: MDPI journal article supplement (https://www.mdpi.com/2571-6255/4/2/19)

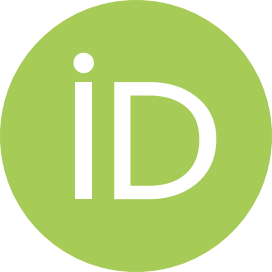

Supplement: s1 [file s1 › fire-1164930-supp/Definitions/logo-orcid-eps-converted-to.pdf]

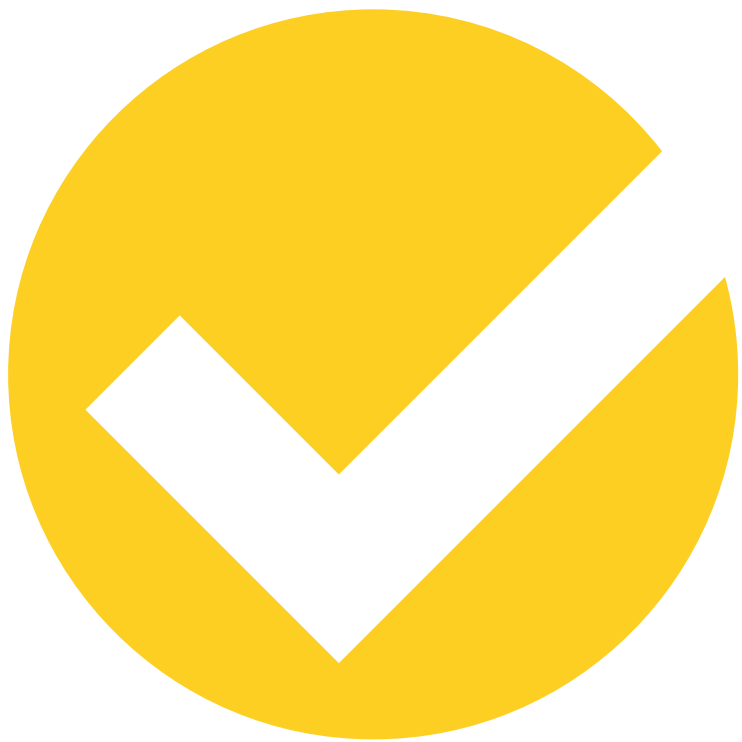

check for  
updates

Supplement: s1 [file s1 › fire-1164930-supp/Definitions/logo-updates.pdf]

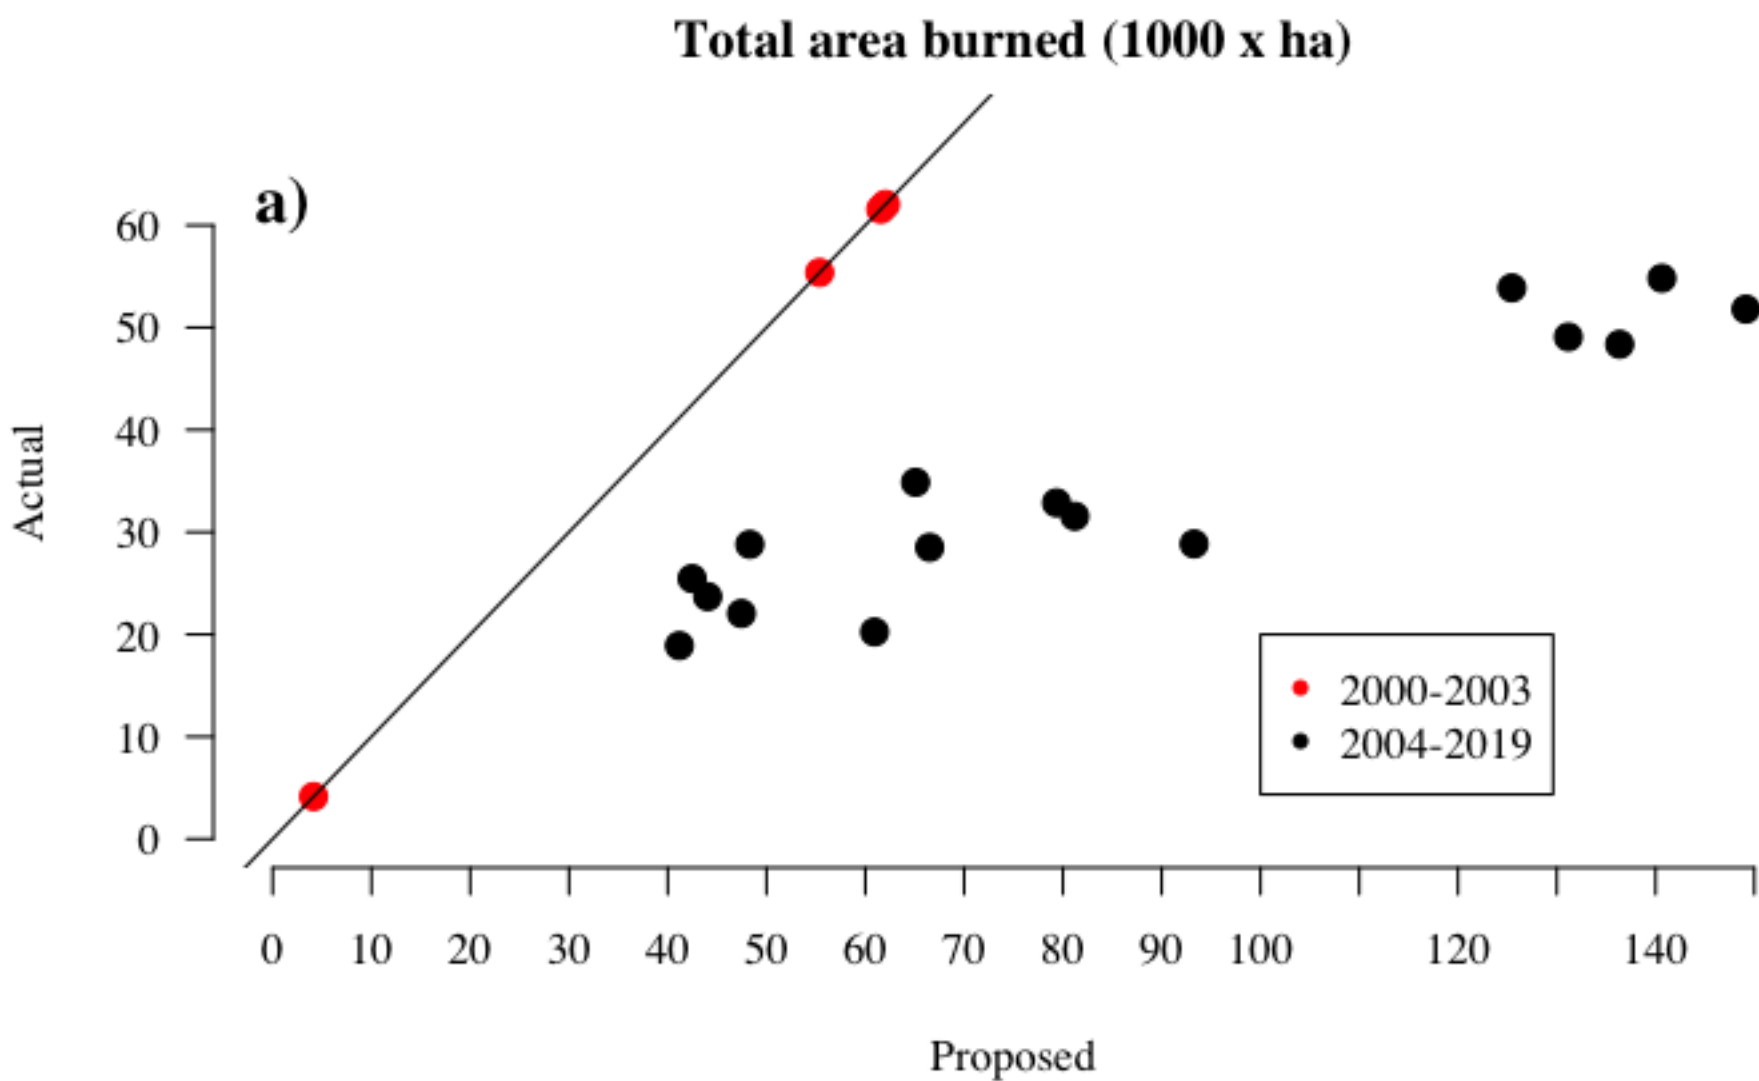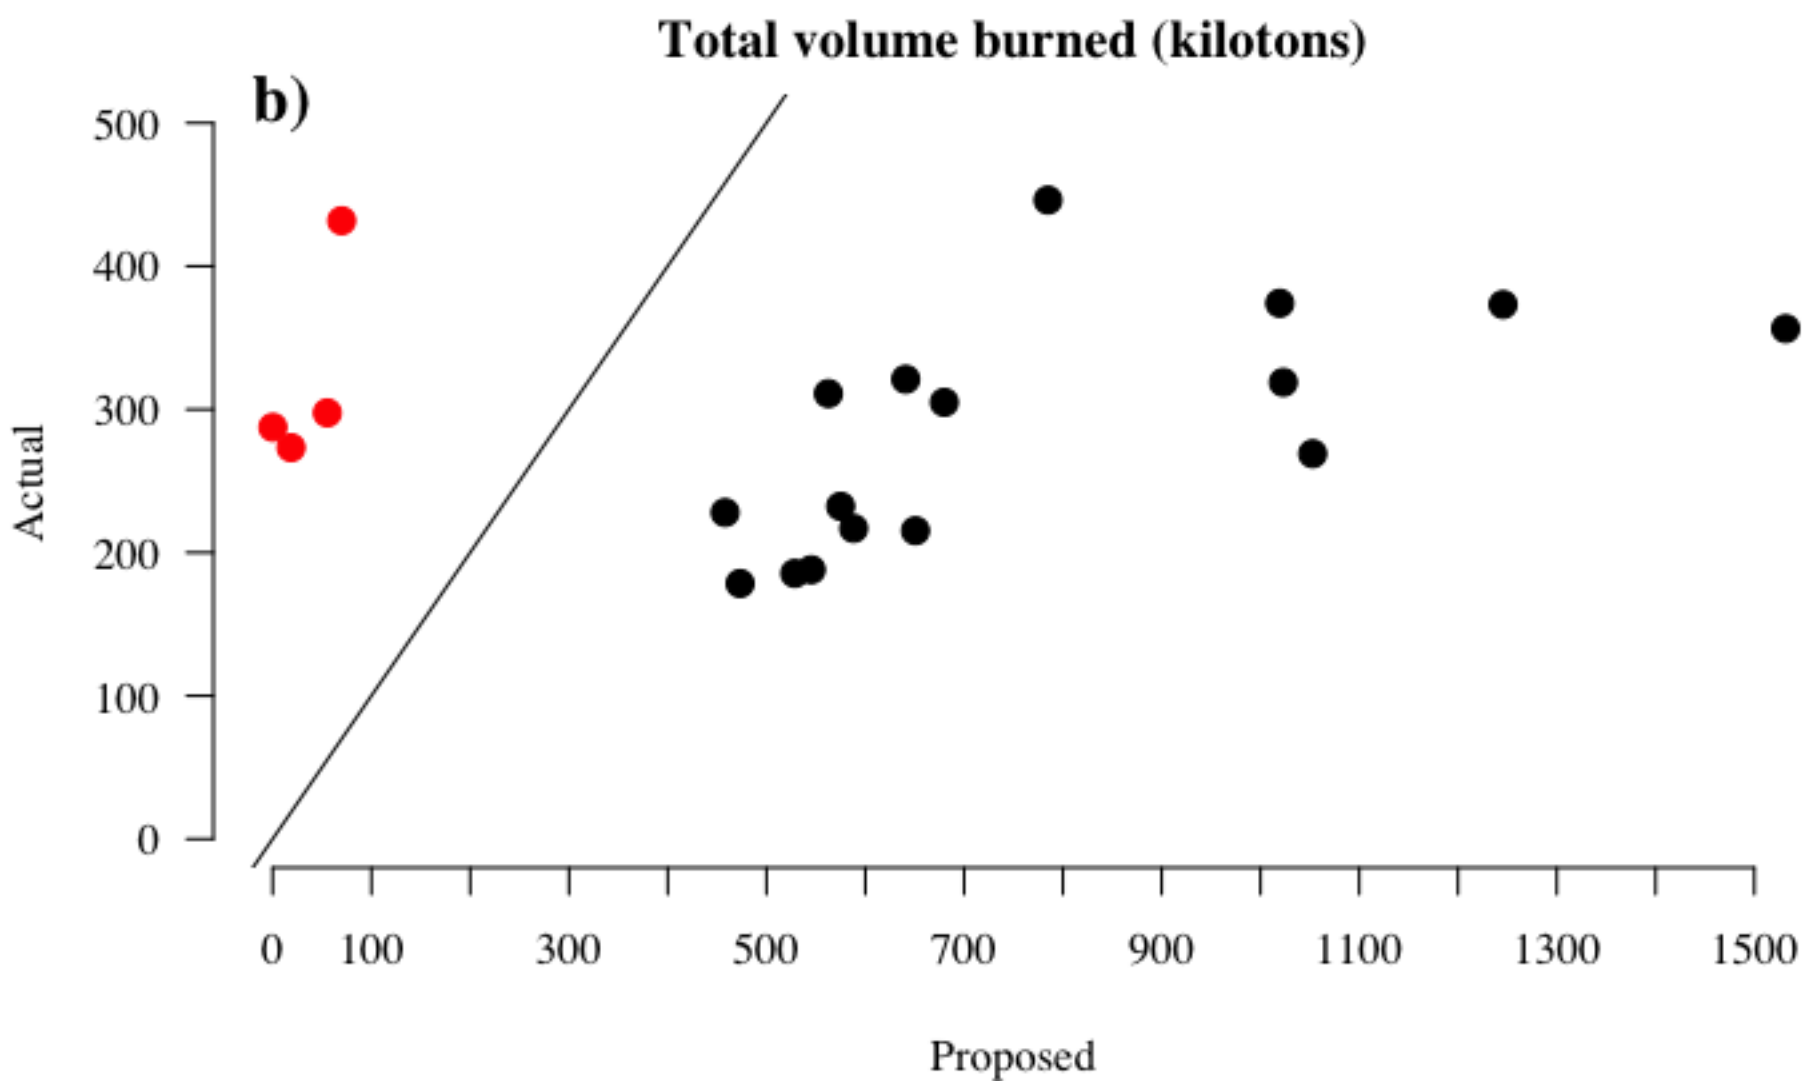

Supplement: s1 [file s1 › fire-1164930-supp/RX_PAPER_FIGS1-eps-converted-to.pdf]

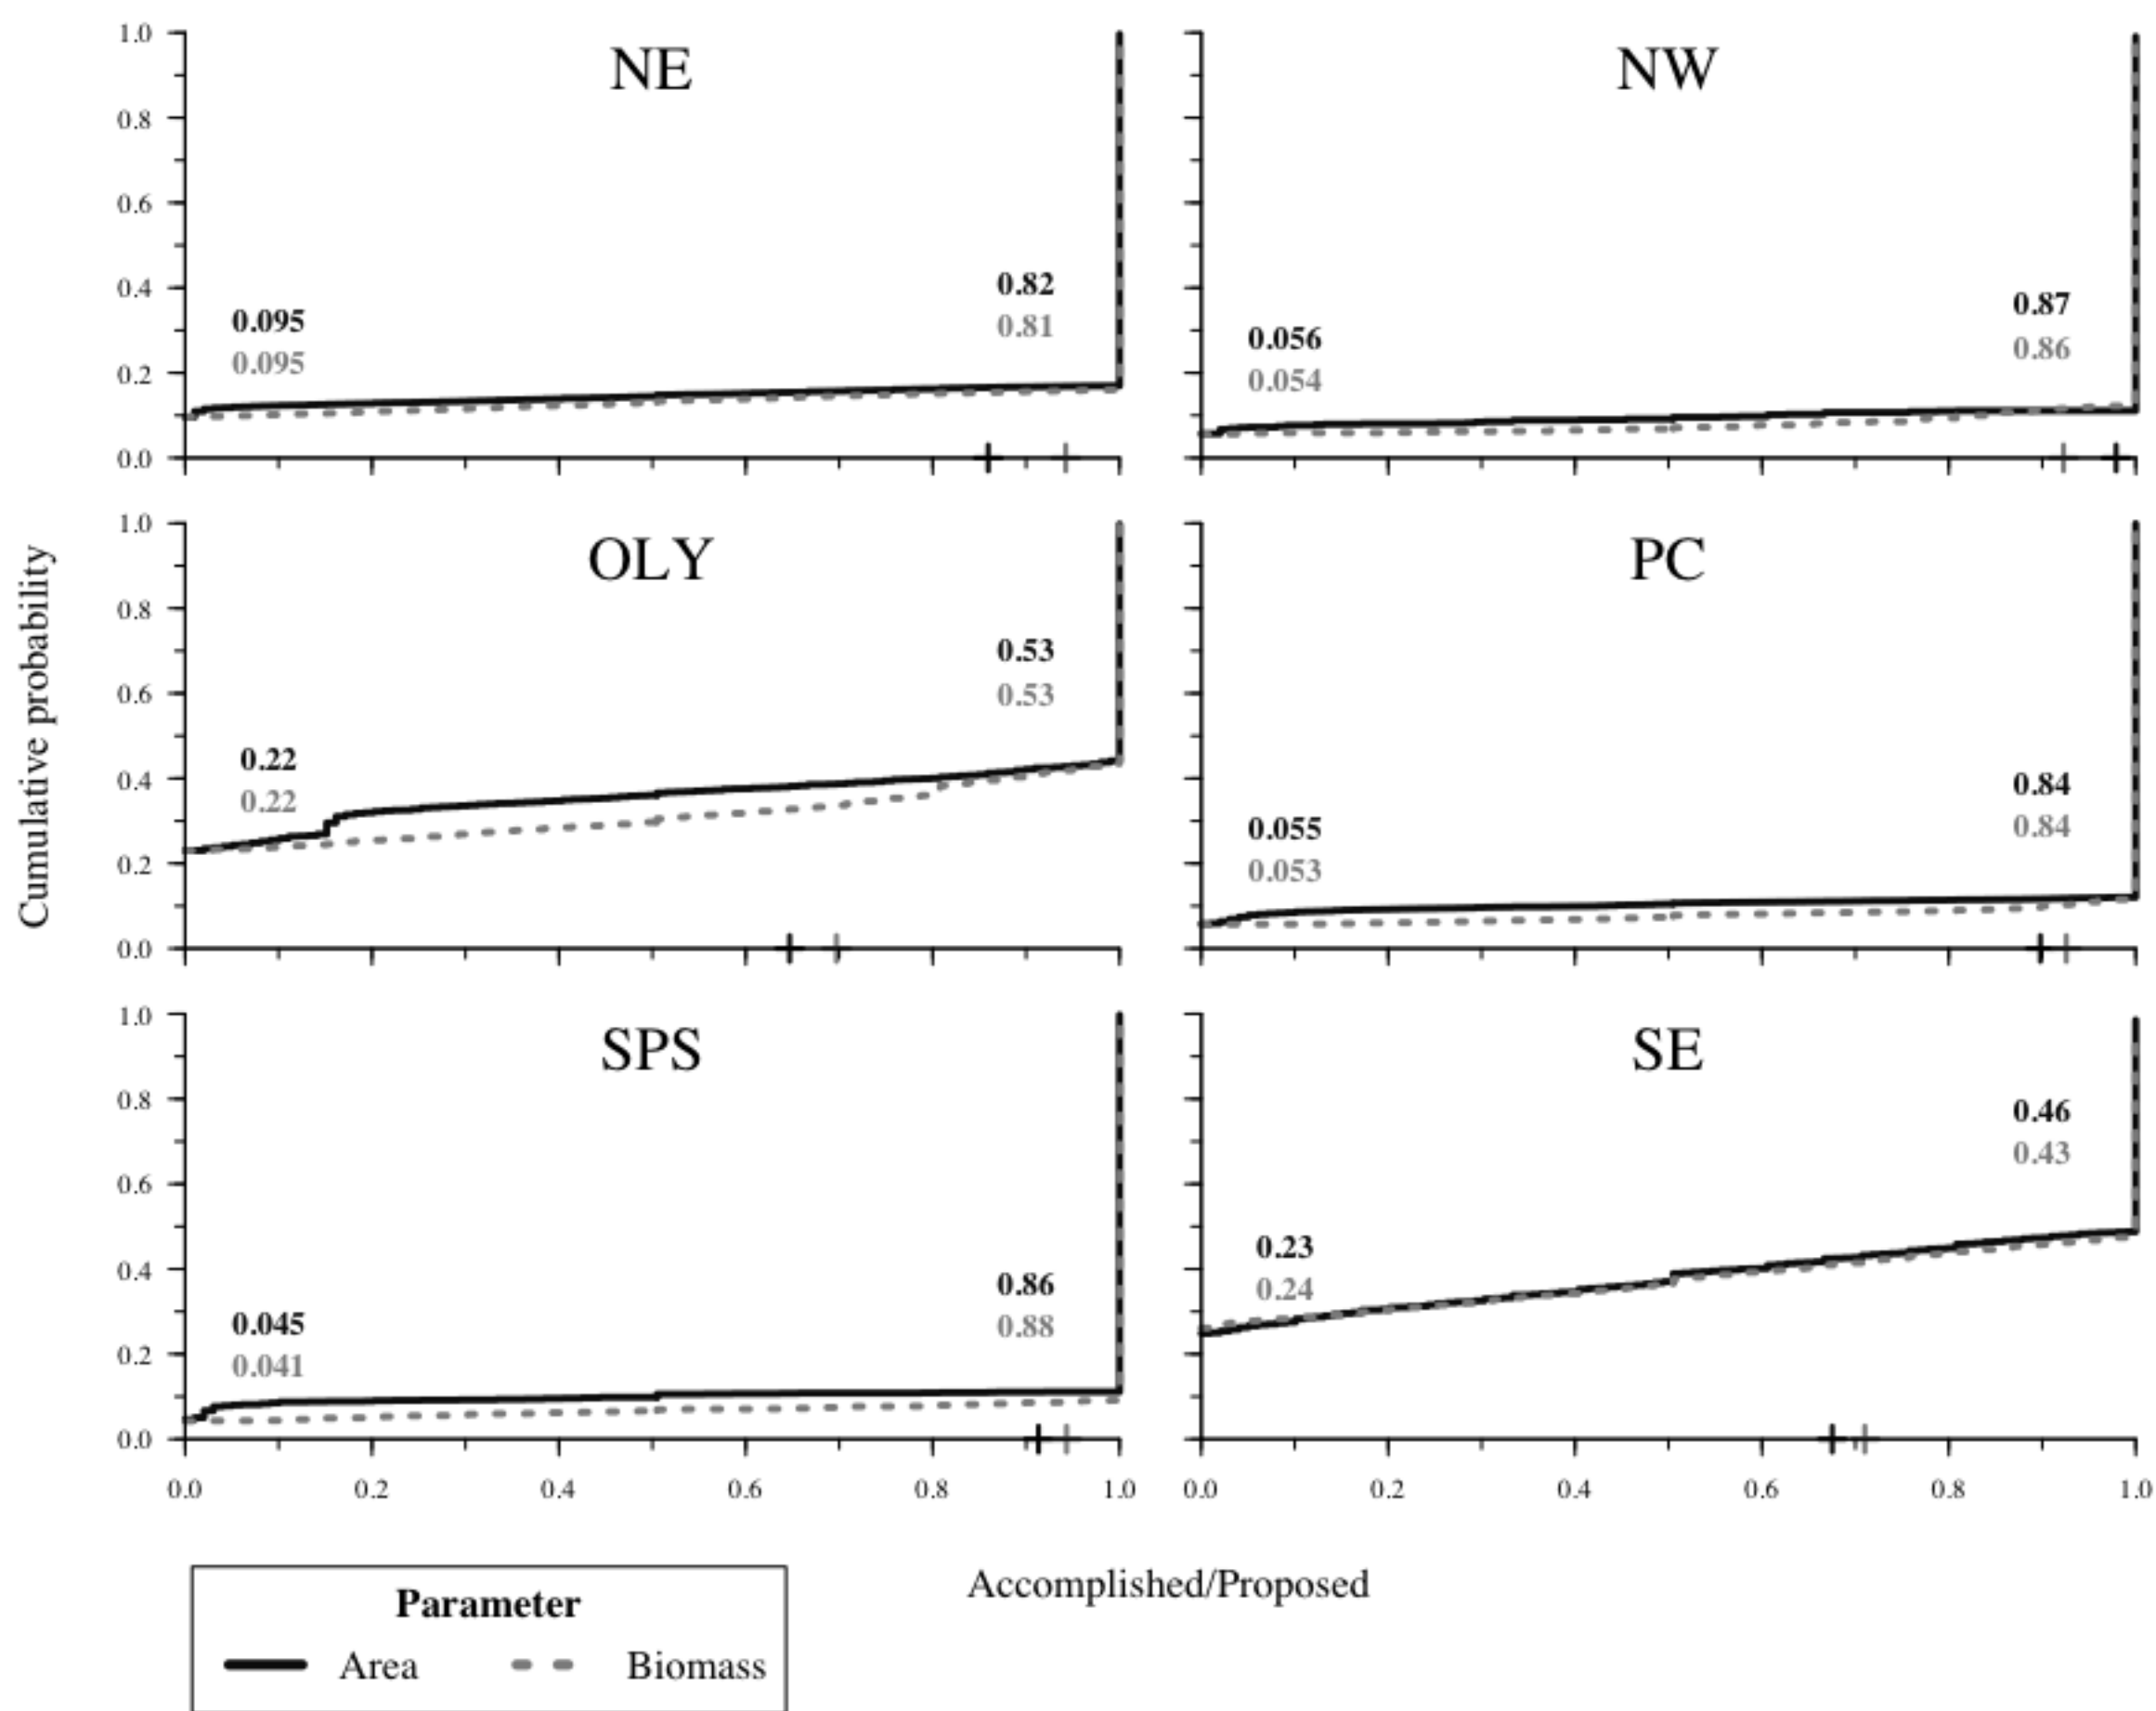

Supplement: s1 [file s1 › fire-1164930-supp/RX_PAPER_FIGS2_DNR-eps-converted-to.pdf]

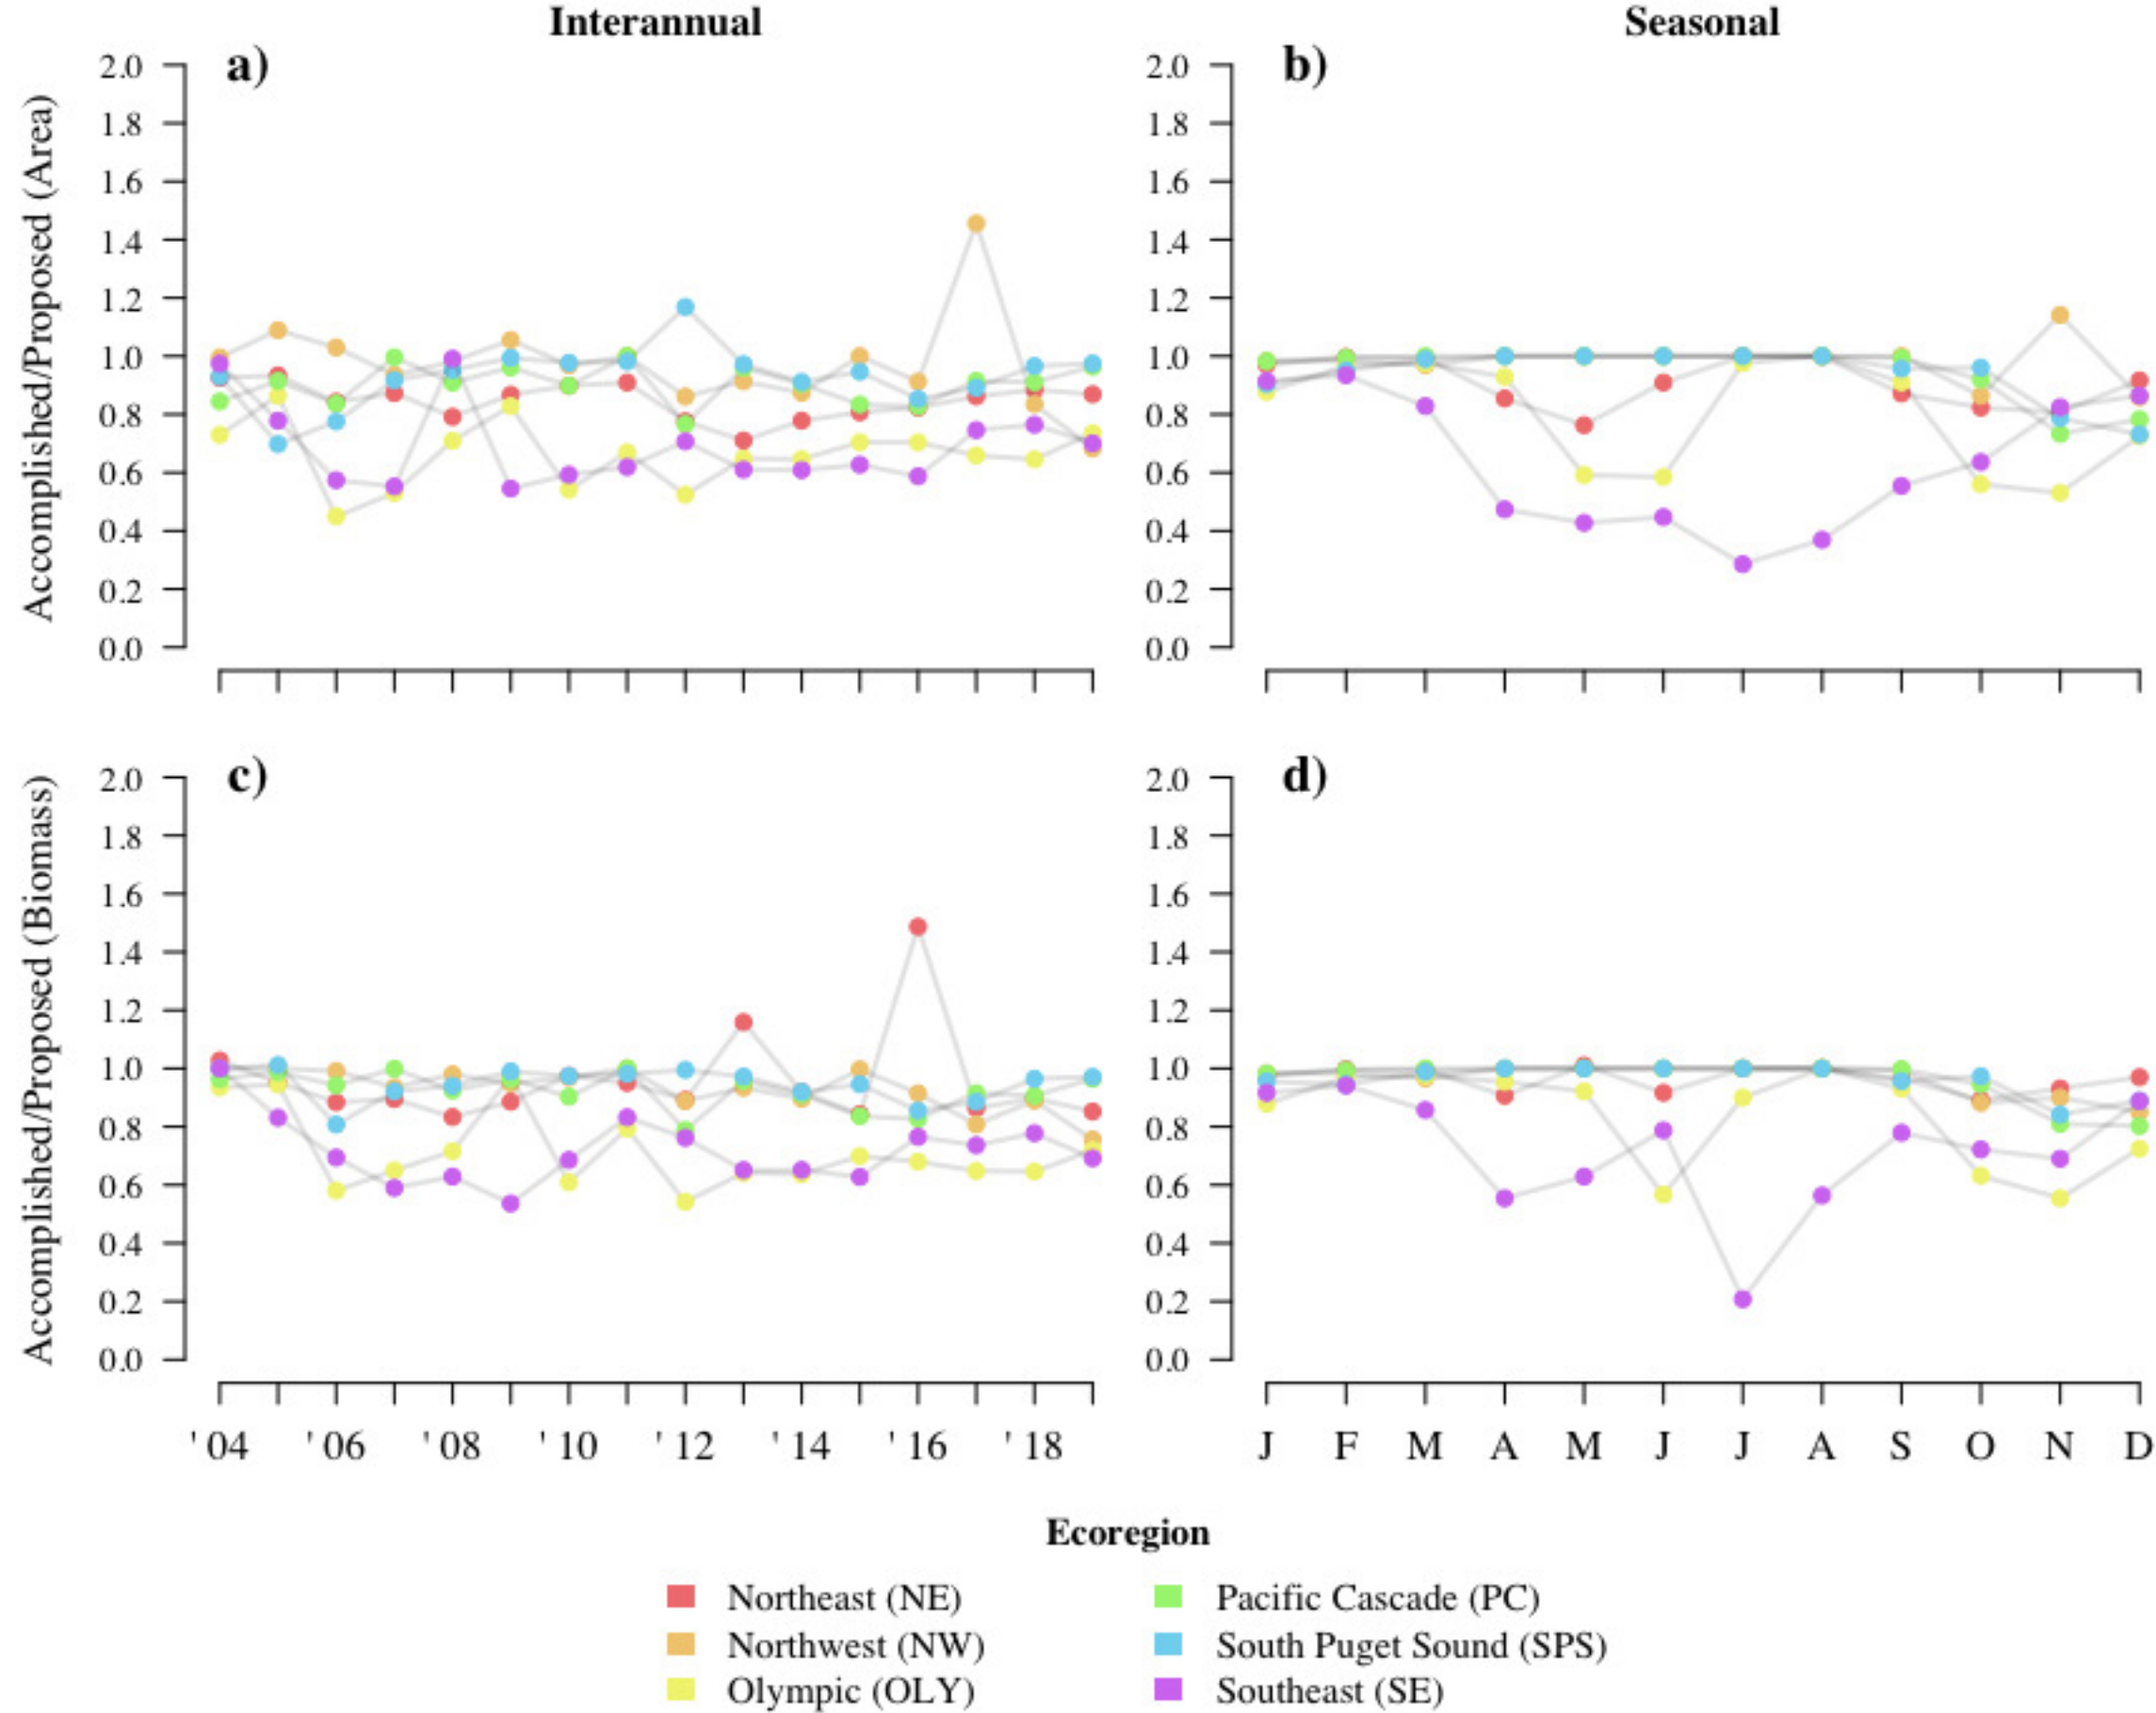

Supplement: s1 [file s1 › fire-1164930-supp/RX_PAPER_FIGS3_DNR-eps-converted-to.pdf]
